# Supplementary material for: The relationship between virtual simulation, critical thinking, and self-directed learning abilities of nursing students in Riyadh, Saudi Arabia
Source: PeerJ. 2024 Oct 9;12:e18150. doi: 10.7717/peerj.18150 (PMC11470764; doi:10.7717/peerj.18150)
Supplement: Supplemental Information 1 [file peerj-12-18150-s001.xlsx]

## Sheet: ردود النموذج 1
Time	Do you agree on participation in this research?	Please select your academic year.	My assessment skills improved.	Debrirfing and group discussion were valuable.	Completing the simulated clinical experience helped me understand classroom information better.	The instructor’s questions helped me to think critically.	I was challenged in my thinking and decision-making skills.	I learned as much from observing my peers as I did when I was actively involved in caring for the simulated patients.	I feel better prepared to care for real patients.	I feel more confident in my decision-making skills.	I am more confident in determining what to tell the health care provider.	I developed a better understanding of the pathophysiology of the conditions in the simulated clinical experience.	I feel more confident that I will be able to recognize changes in my real patient’s condition.	I am able to better predict what changes may occur with my real patients.	I developed a better understanding of the medications that were in the simulated clinical experience.	I think I can get through any complicated problem	I’m handling complicated problems by my criteria	I don’t decide depending on other opinion	I believe my inference to solve the problem	I continually look for pieces of information related to solving a problem	I willingly solve a complicated problem	When I have a a question. I try to get the answers	I’m trying to understand how the unknown things work	When I confront a problem. I try hard to find an answer until solving it	I turn my mistake into an opportunity to learn	I willingly accept the proved truth though having a different opinion	I willingly accept a criticism on my opinion	I evaluate fairly either my opinion or others opinions	I have a reasonable proof	I think any opinion needs to have a reliable reason to insist	I explain reasons if I don't agree with others.	When I am questioned, I think twice before I give my answer.	I tend to make a decision hastily without considering a matter carefully.	I tend to act rashly and carelessly when I face a difficulty.	I don't rush to judgment.	I prefer to think differently from others and routines.	Although something is already set firmly, I have questions on it.	I continually evaluate whether my thought is right or not.	When I see the world, I see it with a questioning mind.	When I judge a matter, I judge objectively.	I have a reputation of being a rational person.	When I solve or judge a problem, I utilized a collection of data by organizing it systematically.	I am open to New learning opportunities.	I am open to new ideas.	When presented with a problem I cannot resolve, I will ask for assistance.	I am responsible.	I like to evaluate what I do.	I have high personal expectations.	I have high personal standards.
2021-02-19 19:30:12	Agree	Third year	Strongly agree	Strongly Agree	Strongly agree	Strongly agree	Strongly agree	Strongly agree	Disagree	Strongly Agree	Strongly agree	Strongly agree	Strongly agree	Strongly agree	Strongly agree	Strongly agree	Strongly agree	Strongly agree	Strongly disagree	Strongly agree	Strongly disagree	Strongly agree	Strongly disagree	Strongly agree	Strongly agree	Strongly agree	Strongly agree	Strongly agree	Strongly agree	Strongly agree	Strongly agree	Strongly agree	Strongly agree	Strongly disagree	Strongly agree	Strongly agree	Strongly agree	Strongly agree	Strongly disagree	Strongly agree	Strongly agree	Strongly agree	Strongly Disagree	Strongly Agree	Strongly Agree	Strongly Agree	Strongly Agree	Strongly Agree	Strongly Agree
2021-02-19 20:23:10	Agree	Fourth year	neither	Disagree	Disagree	Strongly agree	Neither	Disagree	Strongly agree	Disagree	Neithere	Strongly disagree	Agree	Strongly disagree	Neither	Disagree	Strongly disagree	Neither	Strongly agree	Neither	Strongly disagree	Strongly disagree	Agree	Disagree	Strongly agree	Disagree	Agree	Agree	Neither	Agree	Strongly agree	Strongly disagree	Strongly agree	Strongly agree	Strongly agree	Strongly agree	Neither	Strongly agree	Strongly disagree	Disagree	Agree	Agree	Neither	Disagree	Disagree	Disagree	Disagree	Disagree	Disagree
2021-02-19 20:30:13	Agree	Fourth year	Agree	Agree	Strongly agree	Strongly agree	Agree	Agree	Disagree	Disagree	Disagree	Disagree	Disagree	Disagree	Disagree	Disagree	Agree	Agree	Agree	Agree	Disagree	Agree	Agree	Agree	Disagree	Agree	Agree	Agree	Agree	Agree	Agree	Agree	Disagree	Disagree	Disagree	Agree	Agree	Strongly agree	Agree	Agree	Agree	Agree	Agree	Agree	Agree	Strongly Agree	Agree	Agree	Agree
2021-02-19 20:36:10	Agree	Fourth year	Agree	Agree	Strongly agree	Agree	Neither	Agree	Strongly agree	Agree	Agree	Neither	Agree	Agree	Neither	Agree	Neither	Neither	Agree	Neither	Agree	Strongly agree	Agree	Disagree	Disagree	Neither	Agree	Agree	Agree	Agree	Disagree	Disagree	Agree	Strongly disagree	Strongly disagree	Disagree	Neither	Strongly agree	Agree	Agree	Agree	Agree	Agree	Agree	Agree	Agree	Strongly Agree	Strongly Agree	Strongly Agree
2021-02-19 20:51:29	Agree	Fourth year	neither	Agree	Agree	Strongly agree	Agree	Agree	Neither	Disagree	Neithere	Neither	Disagree	Neither	Neither	Disagree	Disagree	Disagree	Neither	Disagree	Neither	Strongly agree	Agree	Agree	Agree	Agree	Neither	Agree	Disagree	Strongly agree	Agree	Agree	Agree	Neither	Agree	Agree	Neither	Agree	Strongly agree	Neither	Neither	Agree	Agree	Agree	Agree	Neither	Agree	Neither	Neither
2021-02-19 20:51:32	Agree	Fourth year	Strongly agree	Strongly Agree	Strongly agree	Agree	Agree	Agree	Agree	Agree	Strongly agree	Strongly agree	Strongly agree	Strongly agree	Strongly agree	Agree	Strongly agree	Strongly agree	Strongly agree	Strongly agree	Strongly agree	Strongly agree	Strongly agree	Strongly agree	Strongly agree	Strongly agree	Strongly agree	Strongly agree	Strongly agree	Strongly agree	Strongly agree	Strongly agree	Strongly agree	Strongly agree	Strongly agree	Strongly agree	Strongly agree	Strongly agree	Strongly agree	Strongly agree	Strongly agree	Agree	Strongly Agree	Strongly Agree	Strongly Agree	Strongly Agree	Strongly Agree	Strongly Agree	Strongly Agree
2021-02-19 21:20:52	Agree	Fourth year	Strongly agree	Strongly Agree	Agree	Strongly agree	Strongly agree	Agree	Agree	Agree	Agree	Agree	Agree	Agree	Agree	Agree	Agree	Agree	Agree	Agree	Agree	Strongly agree	Agree	Agree	Agree	Agree	Neither	Agree	Agree	Agree	Strongly agree	Agree	Disagree	Strongly disagree	Disagree	Neither	Neither	Agree	Agree	Agree	Agree	Agree	Agree	Agree	Neither	Strongly Agree	Strongly Agree	Strongly Agree	Neither
2021-02-19 22:11:20	Agree	Fourth year	Strongly agree	Strongly Agree	Strongly agree	Strongly agree	Strongly agree	Strongly agree	Strongly agree	Strongly Agree	Strongly agree	Strongly agree	Strongly agree	Strongly agree	Strongly agree	Strongly agree	Strongly agree	Strongly agree	Strongly agree	Strongly agree	Strongly agree	Strongly agree	Strongly agree	Strongly agree	Strongly agree	Strongly agree	Strongly agree	Strongly agree	Strongly agree	Strongly agree	Strongly agree	Strongly agree	Strongly agree	Strongly agree	Strongly agree	Strongly agree	Strongly agree	Strongly agree	Strongly agree	Strongly agree	Strongly agree	Strongly agree	Strongly Agree	Strongly Agree	Strongly Agree	Strongly Agree	Strongly Agree	Strongly Agree	Strongly Agree
2021-02-19 22:16:37	Agree	Fourth year	Agree	Agree	Neither	Disagree	Disagree	Agree	Agree	Strongly Agree	Strongly agree	Disagree	Strongly agree	Agree	Agree	Disagree	Agree	Strongly disagree	Agree	Agree	Agree	Agree	Agree	Agree	Agree	Disagree	Disagree	Neither	Neither	Agree	Agree	Agree	Agree	Agree	Agree	Agree	Agree	Agree	Agree	Agree	Agree	Agree	Agree	Agree	Agree	Agree	Agree	Agree	Agree
2021-02-19 22:38:56	Agree	Fourth year	Agree	Agree	Strongly agree	Agree	Disagree	Strongly agree	Agree	Agree	Agree	Neither	Agree	Agree	Agree	Agree	Strongly agree	Agree	Agree	Strongly agree	Agree	Strongly agree	Strongly agree	Strongly agree	Strongly agree	Neither	Agree	Strongly agree	Agree	Agree	Strongly agree	Disagree	Disagree	Disagree	Neither	Disagree	Disagree	Agree	Agree	Agree	Strongly agree	Agree	Strongly Agree	Strongly Agree	Strongly Agree	Agree	Strongly Agree	Agree	Agree
2021-02-19 22:50:53	Agree	Fourth year	Agree	Agree	Agree	Agree	Agree	Agree	Agree	Agree	Agree	Agree	Agree	Agree	Agree	Agree	Agree	Agree	Agree	Agree	Agree	Agree	Agree	Agree	Agree	Agree	Agree	Agree	Agree	Agree	Agree	Agree	Agree	Agree	Agree	Agree	Agree	Agree	Agree	Agree	Agree	Agree	Agree	Agree	Agree	Agree	Agree	Agree	Agree
2021-02-19 23:17:16	Agree	Fourth year	Agree	Agree	Agree	Neither	Agree	Agree	Neither	Agree	Neithere	Neither	Agree	Agree	Agree	Neither	Agree	Agree	Agree	Agree	Agree	Agree	Agree	Agree	Agree	Neither	Neither	Neither	Neither	Neither	Agree	Agree	Neither	Agree	Agree	Disagree	Disagree	Neither	Disagree	Disagree	Agree	Disagree	Agree	Agree	Agree	Agree	Agree	Disagree	Disagree
2021-02-19 23:22:30	Agree	Third year	Agree	Agree	Agree	Agree	Agree	Agree	Agree	Agree	Agree	Agree	Agree	Agree	Agree	Agree	Agree	Agree	Agree	Agree	Neither	Agree	Agree	Strongly agree	Agree	Strongly agree	Strongly agree	Agree	Agree	Agree	Agree	Agree	Neither	Agree	Strongly agree	Strongly agree	Strongly agree	Strongly agree	Agree	Agree	Agree	Agree	Agree	Strongly Agree	Agree	Agree	Agree	Strongly Agree	Agree
2021-02-19 23:23:07	Agree	Third year	Agree	Strongly Agree	Agree	Agree	Agree	Agree	Agree	Strongly Agree	Agree	Strongly agree	Strongly agree	Agree	Strongly agree	Strongly agree	Agree	Agree	Agree	Neither	Disagree	Strongly agree	Strongly agree	Strongly agree	Agree	Agree	Agree	Strongly agree	Strongly agree	Strongly agree	Strongly agree	Strongly agree	Strongly agree	Strongly agree	Strongly agree	Strongly agree	Strongly agree	Strongly agree	Agree	Agree	Agree	Agree	Agree	Agree	Agree	Strongly Agree	Agree	Strongly Agree	Strongly Agree
2021-02-19 23:36:56	Agree	Third year	Agree	Agree	Strongly agree	Agree	Strongly agree	Strongly agree	Strongly agree	Strongly Agree	Strongly agree	Strongly agree	Strongly agree	Strongly agree	Strongly agree	Strongly agree	Strongly agree	Neither	Agree	Agree	Agree	Agree	Agree	Agree	Agree	Agree	Neither	Agree	Agree	Strongly agree	Agree	Agree	Agree	Agree	Agree	Agree	Agree	Agree	Agree	Agree	Agree	Agree	Agree	Agree	Agree	Strongly Agree	Agree	Neither	Neither
2021-02-19 23:40:56	Agree	Fourth year	Agree	Agree	Agree	Neither	Agree	Agree	Agree	Agree	Agree	Strongly agree	Agree	Strongly agree	Agree	Neither	Neither	Disagree	Neither	Agree	Agree	Strongly agree	Strongly agree	Strongly agree	Strongly agree	Agree	Agree	Agree	Agree	Strongly agree	Agree	Strongly agree	Disagree	Disagree	Neither	Neither	Agree	Agree	Agree	Neither	Disagree	Strongly agree	Strongly Agree	Strongly Agree	Strongly Agree	Strongly Agree	Strongly Agree	Neither	Neither
2021-02-19 23:44:53	Agree	Third year	Strongly agree	Agree	Strongly agree	Agree	Strongly agree	Agree	Strongly agree	Strongly Agree	Agree	Strongly agree	Strongly agree	Agree	Agree	Agree	Agree	Disagree	Strongly agree	Agree	Agree	Strongly agree	Agree	Agree	Neither	Agree	Agree	Agree	Agree	Neither	Neither	Strongly disagree	Agree	Strongly agree	Agree	Agree	Agree	Agree	Agree	Disagree	Agree	Agree	Neither	Strongly Agree	Agree	Agree	Strongly Agree	Strongly Agree	Strongly Agree
2021-02-19 23:45:58	Agree	Fourth year	Agree	Agree	Agree	Agree	Agree	Strongly agree	Agree	Strongly Agree	Agree	Strongly agree	Strongly agree	Strongly agree	Strongly agree	Strongly agree	Strongly agree	Strongly agree	Strongly agree	Strongly agree	Strongly agree	Strongly agree	Strongly agree	Strongly agree	Strongly agree	Strongly agree	Strongly agree	Strongly agree	Strongly agree	Strongly agree	Strongly agree	Agree	Agree	Agree	Agree	Agree	Strongly agree	Strongly agree	Strongly agree	Strongly agree	Strongly agree	Agree	Agree	Strongly Agree	Agree	Agree	Strongly Agree	Strongly Agree	Strongly Agree
2021-02-19 23:47:24	Agree	Third year	Agree	Agree	Agree	Agree	Agree	Agree	Disagree	Neither	Neithere	Disagree	Agree	Disagree	Neither	Agree	Neither	Disagree	Agree	Agree	Strongly disagree	Disagree	Neither	Agree	Agree	Agree	Agree	Neither	Disagree	Strongly disagree	Strongly agree	Strongly agree	Neither	Neither	Strongly disagree	Neither	Strongly agree	Neither	Strongly agree	Disagree	Neither	Agree	Strongly Agree	Disagree	Neither	Disagree	Strongly Disagree	Disagree	Strongly Disagree
2021-02-19 23:51:51	Agree	Third year	Agree	Agree	Agree	Agree	Agree	Agree	Agree	Agree	Agree	Agree	Agree	Agree	Agree	Agree	Agree	Agree	Agree	Agree	Agree	Agree	Agree	Agree	Agree	Agree	Agree	Agree	Agree	Agree	Agree	Agree	Agree	Agree	Agree	Agree	Agree	Agree	Agree	Agree	Agree	Agree	Agree	Agree	Agree	Agree	Agree	Agree	Agree
2021-02-19 23:56:18	Agree	Fourth year	Strongly agree	Agree	Strongly agree	Agree	Strongly agree	Agree	Strongly agree	Strongly Agree	Strongly agree	Agree	Agree	Neither	Neither	Neither	Neither	Neither	Disagree	Strongly agree	Agree	Strongly agree	Strongly agree	Strongly agree	Strongly agree	Strongly agree	Strongly agree	Strongly agree	Strongly agree	Strongly agree	Strongly agree	Strongly agree	Strongly agree	Strongly agree	Strongly agree	Strongly agree	Strongly agree	Strongly agree	Strongly agree	Strongly agree	Strongly agree	Strongly agree	Strongly Agree	Strongly Agree	Strongly Disagree	Strongly Agree	Strongly Agree	Strongly Agree	Strongly Agree
2021-02-19 23:59:15	Agree	Fourth year	Agree	Agree	Agree	Agree	Strongly agree	Strongly agree	Strongly agree	Neither	Agree	Agree	Agree	Neither	Agree	Disagree	Neither	Agree	Neither	Agree	Disagree	Disagree	Strongly agree	Agree	Disagree	Strongly agree	Neither	Agree	Agree	Agree	Disagree	Strongly agree	Disagree	Disagree	Strongly agree	Strongly agree	Disagree	Agree	Disagree	Strongly agree	Disagree	Neither	Agree	Agree	Neither	Agree	Neither	Neither	Neither
2021-02-20 00:17:05	Agree	Fourth year	Agree	Agree	Agree	Agree	Agree	Agree	Agree	Agree	Neithere	Agree	Agree	Agree	Neither	Agree	Agree	Agree	Agree	Agree	Agree	Agree	Agree	Agree	Agree	Agree	Agree	Agree	Agree	Agree	Agree	Agree	Agree	Agree	Agree	Agree	Agree	Agree	Agree	Agree	Agree	Agree	Agree	Agree	Agree	Agree	Agree	Agree	Agree
2021-02-20 00:22:32	Agree	Fourth year	Strongly agree	Strongly Agree	Strongly agree	Strongly agree	Strongly agree	Strongly agree	Strongly agree	Strongly Agree	Strongly agree	Strongly agree	Strongly agree	Strongly agree	Strongly agree	Agree	Agree	Disagree	Agree	Agree	Agree	Agree	Agree	Agree	Agree	Agree	Agree	Agree	Agree	Agree	Agree	Agree	Agree	Agree	Agree	Agree	Agree	Agree	Agree	Agree	Agree	Agree	Agree	Agree	Agree	Agree	Agree	Agree	Agree
2021-02-20 00:43:45	Agree	Fourth year	neither	Strongly Agree	Agree	Agree	Strongly agree	Strongly agree	Strongly agree	Agree	Strongly agree	Neither	Neither	Agree	Agree	Agree	Disagree	Disagree	Agree	Strongly agree	Neither	Agree	Disagree	Disagree	Agree	Disagree	Strongly disagree	Strongly disagree	Agree	Agree	Agree	Strongly disagree	Strongly disagree	Agree	Neither	Neither	Neither	Strongly agree	Strongly agree	Agree	Neither	Agree	Agree	Neither	Strongly Agree	Strongly Disagree	Strongly Disagree	Strongly Disagree	Neither
2021-02-20 00:55:26	Agree	Fourth year	neither	Strongly disagree	Disagree	Agree	Agree	Agree	Agree	Agree	Agree	Agree	Strongly agree	Agree	Agree	Agree	Agree	Agree	Agree	Agree	Agree	Agree	Agree	Agree	Agree	Agree	Agree	Agree	Agree	Agree	Agree	Agree	Agree	Neither	Neither	Agree	Agree	Agree	Agree	Agree	Agree	Agree	Strongly Agree	Strongly Agree	Agree	Strongly Agree	Strongly Agree	Strongly Agree	Strongly Agree
2021-02-20 01:01:29	Agree	Fourth year	Agree	Agree	Agree	Agree	Agree	Agree	Neither	Neither	Neithere	Agree	Neither	Neither	Agree	Agree	Agree	Neither	Agree	Agree	Neither	Agree	Disagree	Agree	Agree	Neither	Neither	Agree	Agree	Neither	Agree	Strongly agree	Disagree	Disagree	Agree	Neither	Agree	Agree	Agree	Agree	Neither	Agree	Strongly Agree	Strongly Agree	Strongly Agree	Strongly Agree	Agree	Neither	Agree
2021-02-20 01:40:01	Agree	Fourth year	Agree	Agree	Agree	Strongly agree	Strongly agree	Strongly agree	Agree	Agree	Strongly agree	Strongly agree	Strongly agree	Strongly agree	Agree	Agree	Agree	Neither	Agree	Strongly agree	Agree	Strongly agree	Strongly agree	Strongly agree	Agree	Agree	Agree	Agree	Agree	Strongly agree	Agree	Agree	Disagree	Disagree	Agree	Neither	Agree	Agree	Agree	Neither	Agree	Agree	Agree	Agree	Agree	Strongly Agree	Strongly Agree	Strongly Agree	Agree
2021-02-20 01:46:22	Agree	Third year	Agree	Agree	Agree	Agree	Agree	Agree	Agree	Agree	Agree	Agree	Agree	Agree	Agree	Agree	Agree	Agree	Agree	Agree	Neither	Agree	Agree	Strongly agree	Agree	Strongly agree	Strongly agree	Agree	Agree	Agree	Agree	Agree	Neither	Agree	Strongly agree	Strongly agree	Strongly agree	Strongly agree	Agree	Agree	Agree	Agree	Agree	Strongly Agree	Agree	Agree	Agree	Strongly Agree	Agree
2021-02-20 02:18:02	Agree	Third year	Agree	Agree	Agree	Agree	Agree	Agree	Agree	Agree	Agree	Agree	Agree	Agree	Agree	Agree	Agree	Agree	Agree	Agree	Agree	Agree	Agree	Agree	Agree	Agree	Agree	Agree	Agree	Agree	Agree	Agree	Agree	Agree	Agree	Agree	Agree	Agree	Agree	Agree	Agree	Agree	Agree	Agree	Agree	Agree	Agree	Agree	Agree
2021-02-20 02:18:33	Agree	Third year	Agree	Agree	Agree	Agree	Agree	Agree	Agree	Agree	Agree	Agree	Agree	Agree	Agree	Agree	Agree	Agree	Agree	Agree	Agree	Agree	Agree	Agree	Agree	Agree	Agree	Agree	Agree	Agree	Agree	Agree	Agree	Agree	Agree	Agree	Agree	Agree	Agree	Agree	Agree	Agree	Agree	Agree	Agree	Agree	Agree	Agree	Agree
2021-02-20 02:40:43	Agree	Fourth year	Agree	Agree	Agree	Agree	Disagree	Agree	Disagree	Agree	Agree	Agree	Disagree	Neither	Agree	Neither	Agree	Neither	Agree	Neither	Neither	Agree	Disagree	Agree	Agree	Agree	Neither	Neither	Neither	Neither	Agree	Agree	Agree	Agree	Neither	Agree	Neither	Agree	Agree	Agree	Neither	Agree	Agree	Agree	Agree	Agree	Agree	Agree	Agree
2021-02-20 03:14:36	Agree	Fourth year	Strongly agree	Strongly Agree	Agree	Strongly agree	Strongly agree	Agree	Agree	Agree	Agree	Agree	Agree	Agree	Agree	Agree	Agree	Agree	Agree	Agree	Agree	Strongly agree	Agree	Agree	Agree	Agree	Neither	Agree	Agree	Agree	Strongly agree	Agree	Disagree	Strongly disagree	Disagree	Neither	Neither	Agree	Agree	Agree	Agree	Agree	Agree	Agree	Neither	Strongly Agree	Strongly Agree	Strongly Agree	Neither
2021-02-20 03:44:42	Agree	Fourth year	Agree	Strongly Agree	Strongly agree	Agree	Agree	Strongly agree	Strongly agree	Disagree	Disagree	Agree	Agree	Agree	Agree	Disagree	Neither	Neither	Agree	Agree	Neither	Agree	Agree	Agree	Agree	Strongly agree	Agree	Strongly agree	Strongly agree	Strongly agree	Strongly agree	Strongly agree	Strongly disagree	Strongly disagree	Strongly agree	Agree	Agree	Agree	Strongly agree	Strongly agree	Strongly agree	Strongly agree	Strongly Agree	Strongly Agree	Strongly Agree	Strongly Agree	Strongly Agree	Strongly Agree	Strongly Agree
2021-02-20 14:05:12	Agree	Third year	Agree	Strongly Agree	Agree	Strongly agree	Agree	Strongly agree	Agree	Agree	Agree	Agree	Agree	Agree	Agree	Agree	Agree	Disagree	Agree	Agree	Agree	Agree	Neither	Agree	Agree	Agree	Agree	Agree	Neither	Neither	Agree	Agree	Agree	Disagree	Agree	Agree	Neither	Agree	Agree	Neither	Agree	Agree	Strongly Agree	Strongly Agree	Agree	Strongly Agree	Agree	Strongly Agree	Agree
2021-02-20 15:03:51	Agree	Fourth year	Agree	Agree	Agree	Neither	Strongly agree	Agree	Neither	Agree	Agree	Disagree	Neither	Disagree	Disagree	Strongly agree	Strongly disagree	Agree	Neither	Agree	Agree	Agree	Agree	Agree	Agree	Agree	Agree	Agree	Agree	Agree	Agree	Agree	Agree	Agree	Agree	Agree	Agree	Agree	Agree	Agree	Agree	Agree	Agree	Agree	Agree	Agree	Agree	Agree	Agree
2021-02-20 15:24:30	Agree	Fourth year	Agree	Agree	Agree	Strongly agree	Strongly agree	Neither	Agree	Agree	Agree	Agree	Agree	Agree	Agree	Neither	Agree	Neither	Agree	Agree	Neither	Strongly agree	Neither	Agree	Strongly agree	Strongly agree	Disagree	Agree	Agree	Agree	Agree	Agree	Strongly disagree	Disagree	Neither	Neither	Agree	Agree	Agree	Agree	Agree	Agree	Agree	Agree	Strongly Agree	Strongly Agree	Strongly Agree	Strongly Agree	Strongly Agree
2021-02-20 16:32:26	Agree	Third year	Strongly agree	Agree	Strongly agree	Agree	Strongly agree	Agree	Strongly agree	Strongly Agree	Agree	Strongly agree	Strongly agree	Agree	Agree	Agree	Agree	Disagree	Strongly agree	Agree	Agree	Strongly agree	Agree	Agree	Neither	Agree	Agree	Agree	Agree	Neither	Neither	Strongly disagree	Agree	Strongly agree	Agree	Agree	Agree	Agree	Agree	Disagree	Agree	Agree	Neither	Strongly Agree	Agree	Agree	Strongly Agree	Strongly Agree	Strongly Agree
2021-02-20 16:50:26	Agree	Fourth year	Strongly agree	Strongly Agree	Strongly agree	Agree	Agree	Agree	Strongly agree	Agree	Strongly agree	Agree	Agree	Agree	Strongly agree	Agree	Agree	Strongly agree	Strongly agree	Strongly agree	Strongly agree	Agree	Agree	Strongly agree	Agree	Strongly agree	Strongly agree	Agree	Agree	Agree	Agree	Strongly agree	Strongly agree	Strongly agree	Agree	Agree	Strongly agree	Strongly agree	Strongly agree	Strongly agree	Agree	Agree	Strongly Agree	Strongly Agree	Strongly Agree	Strongly Agree	Strongly Agree	Strongly Agree	Strongly Agree
2021-02-20 16:57:12	Agree	Fourth year	Strongly agree	Agree	Strongly agree	Strongly agree	Strongly agree	Strongly agree	Strongly agree	Strongly Agree	Strongly agree	Strongly agree	Strongly agree	Strongly agree	Agree	Neither	Agree	Neither	Strongly agree	Strongly agree	Neither	Strongly agree	Strongly agree	Strongly agree	Strongly agree	Strongly agree	Strongly agree	Strongly agree	Agree	Strongly agree	Strongly agree	Strongly agree	Disagree	Neither	Agree	Disagree	Disagree	Disagree	Neither	Neither	Neither	Agree	Agree	Strongly Agree	Strongly Agree	Strongly Agree	Strongly Agree	Strongly Agree	Agree
2021-02-20 17:08:34	Agree	Fourth year	Strongly disagree	Strongly disagree	Strongly disagree	Strongly disagree	Strongly disagree	Strongly disagree	Strongly disagree	Strongly disagree	Strongly disagree	Strongly disagree	Strongly disagree	Disagree	Agree	Agree	Strongly agree	Strongly agree	Strongly agree	Strongly agree	Agree	Strongly agree	Strongly agree	Strongly agree	Strongly agree	Agree	Neither	Agree	Neither	Agree	Agree	Agree	Agree	Agree	Agree	Disagree	Strongly agree	Disagree	Strongly agree	Agree	Strongly agree	Strongly disagree	Agree	Agree	Agree	Agree	Agree	Agree	Agree
2021-02-20 17:09:22	Agree	Fourth year	Agree	Agree	Agree	Agree	Strongly agree	Strongly agree	Strongly agree	Strongly Agree	Strongly agree	Strongly agree	Strongly agree	Strongly agree	Strongly agree	Agree	Agree	Agree	Agree	Agree	Strongly agree	Agree	Strongly agree	Strongly agree	Strongly agree	Strongly agree	Strongly agree	Agree	Agree	Agree	Strongly agree	Agree	Neither	Strongly disagree	Neither	Strongly agree	Agree	Agree	Agree	Agree	Agree	Strongly agree	Agree	Strongly Agree	Agree	Strongly Agree	Agree	Agree	Agree
2021-02-20 17:23:28	Agree	Fourth year	Agree	Agree	Agree	Agree	Agree	Agree	Neither	Agree	Agree	Neither	Agree	Agree	Neither	Neither	Agree	Disagree	Neither	Agree	Agree	Agree	Agree	Agree	Agree	Agree	Agree	Agree	Agree	Agree	Agree	Agree	Disagree	Disagree	Agree	Agree	Agree	Agree	Agree	Agree	Agree	Agree	Agree	Agree	Neither	Agree	Agree	Agree	Agree
2021-02-20 17:36:34	Agree	Fourth year	Agree	Agree	Agree	Agree	Strongly agree	Strongly agree	Strongly agree	Strongly Agree	Strongly agree	Strongly agree	Strongly agree	Strongly agree	Strongly agree	Agree	Agree	Agree	Agree	Agree	Strongly agree	Agree	Strongly agree	Strongly agree	Strongly agree	Strongly agree	Strongly agree	Agree	Agree	Agree	Strongly agree	Agree	Neither	Strongly disagree	Neither	Strongly agree	Agree	Agree	Agree	Agree	Agree	Strongly agree	Agree	Strongly Agree	Agree	Strongly Agree	Agree	Agree	Agree
2021-02-20 17:38:05	Agree	Fourth year	Agree	Agree	Agree	Agree	Agree	Agree	Agree	Agree	Agree	Agree	Agree	Agree	Agree	Agree	Agree	Agree	Neither	Neither	Agree	Agree	Agree	Neither	Agree	Agree	Agree	Agree	Agree	Agree	Agree	Neither	Agree	Agree	Agree	Agree	Agree	Agree	Agree	Agree	Agree	Agree	Agree	Agree	Agree	Neither	Neither	Neither	Neither
2021-02-20 17:38:46	Agree	Fourth year	Agree	Agree	Agree	Agree	Agree	Agree	Strongly agree	Agree	Agree	Agree	Agree	Agree	Neither	Neither	Neither	Agree	Agree	Agree	Agree	Agree	Agree	Agree	Strongly agree	Agree	Agree	Agree	Agree	Agree	Agree	Neither	Neither	Disagree	Strongly agree	Agree	Agree	Agree	Agree	Agree	Strongly agree	Agree	Agree	Agree	Agree	Agree	Strongly Agree	Agree	Agree
2021-02-20 17:46:08	Agree	Fourth year	Agree	Agree	Strongly agree	Strongly agree	Strongly agree	Agree	Agree	Agree	Agree	Agree	Agree	Agree	Agree	Agree	Neither	Neither	Neither	Neither	Neither	Neither	Neither	Neither	Neither	Neither	Neither	Neither	Neither	Neither	Neither	Neither	Neither	Neither	Neither	Neither	Neither	Neither	Neither	Neither	Neither	Neither	Agree	Agree	Neither	Agree	Agree	Agree	Agree
2021-02-20 17:54:08	Agree	Fourth year	Agree	Agree	Agree	Agree	Strongly agree	Strongly agree	Strongly agree	Strongly Agree	Strongly agree	Strongly agree	Strongly agree	Strongly agree	Strongly agree	Agree	Agree	Agree	Agree	Agree	Strongly agree	Agree	Strongly agree	Strongly agree	Strongly agree	Strongly agree	Strongly agree	Agree	Agree	Agree	Strongly agree	Agree	Neither	Strongly disagree	Neither	Strongly agree	Agree	Agree	Agree	Agree	Agree	Strongly agree	Agree	Strongly Agree	Agree	Strongly Agree	Agree	Agree	Agree
2021-02-20 17:58:45	Agree	Fourth year	Strongly disagree	Disagree	Neither	Disagree	Disagree	Neither	Disagree	Strongly Agree	Disagree	Strongly agree	Strongly agree	Strongly agree	Strongly agree	Disagree	Strongly disagree	Strongly agree	Strongly agree	Neither	Neither	Agree	Strongly disagree	Strongly agree	Neither	Disagree	Disagree	Agree	Strongly agree	Agree	Neither	Strongly agree	Disagree	Disagree	Strongly agree	Strongly agree	Strongly disagree	Strongly disagree	Neither	Disagree	Strongly agree	Neither	Strongly Disagree	Disagree	Strongly Agree	Strongly Agree	Strongly Agree	Strongly Agree	Strongly Agree
2021-02-20 18:05:24	Agree	Fourth year	Strongly disagree	Strongly disagree	Strongly disagree	Strongly disagree	Strongly disagree	Strongly disagree	Strongly disagree	Strongly disagree	Strongly disagree	Strongly disagree	Strongly disagree	Disagree	Agree	Agree	Strongly agree	Strongly agree	Strongly agree	Strongly agree	Agree	Strongly agree	Strongly agree	Strongly agree	Strongly agree	Agree	Neither	Agree	Neither	Agree	Agree	Agree	Agree	Agree	Agree	Disagree	Strongly agree	Disagree	Strongly agree	Agree	Strongly agree	Strongly disagree	Agree	Agree	Agree	Agree	Agree	Agree	Agree
2021-02-20 18:14:28	Agree	Fourth year	Agree	Strongly Agree	Agree	Agree	Agree	Agree	Agree	Neither	Neithere	Neither	Agree	Agree	Agree	Neither	Neither	Neither	Agree	Strongly agree	Agree	Strongly agree	Strongly agree	Strongly agree	Strongly agree	Strongly agree	Agree	Strongly agree	Strongly agree	Agree	Strongly agree	Strongly agree	Neither	Disagree	Agree	Strongly agree	Agree	Agree	Strongly agree	Agree	Agree	Agree	Strongly Agree	Strongly Agree	Strongly Agree	Agree	Strongly Agree	Strongly Agree	Strongly Agree
2021-02-20 18:15:58	Agree	Third year	Agree	Agree	Agree	Agree	Agree	Agree	Agree	Agree	Agree	Agree	Agree	Agree	Agree	Agree	Agree	Agree	Agree	Agree	Agree	Agree	Agree	Agree	Agree	Agree	Agree	Agree	Agree	Agree	Agree	Agree	Agree	Agree	Agree	Agree	Agree	Agree	Agree	Agree	Agree	Agree	Agree	Agree	Agree	Agree	Agree	Agree	Agree
2021-02-20 18:23:05	Agree	Fourth year	Agree	Agree	Neither	Agree	Disagree	Neither	Neither	Neither	Disagree	Neither	Agree	Disagree	Disagree	Disagree	Agree	Disagree	Agree	Agree	Agree	Agree	Agree	Agree	Agree	Agree	Agree	Agree	Agree	Neither	Agree	Strongly agree	Neither	Neither	Agree	Agree	Agree	Agree	Agree	Agree	Neither	Agree	Agree	Agree	Agree	Agree	Agree	Agree	Neither
2021-02-20 18:59:08	Agree	Fourth year	Strongly agree	Strongly Agree	Strongly agree	Agree	Agree	Agree	Strongly agree	Agree	Strongly agree	Agree	Agree	Agree	Strongly agree	Agree	Agree	Strongly agree	Strongly agree	Strongly agree	Strongly agree	Agree	Agree	Strongly agree	Agree	Strongly agree	Strongly agree	Agree	Agree	Agree	Agree	Strongly agree	Strongly agree	Strongly agree	Agree	Agree	Strongly agree	Strongly agree	Strongly agree	Strongly agree	Agree	Agree	Strongly Agree	Strongly Agree	Strongly Agree	Strongly Agree	Strongly Agree	Strongly Agree	Strongly Agree
2021-02-20 19:19:20	Agree	Fourth year	Agree	Strongly Agree	Agree	Agree	Agree	Strongly agree	Strongly agree	Strongly Agree	Strongly agree	Agree	Agree	Agree	Neither	Agree	Agree	Neither	Agree	Agree	Agree	Strongly agree	Agree	Strongly agree	Agree	Strongly agree	Agree	Strongly agree	Strongly agree	Agree	Agree	Strongly agree	Disagree	Strongly disagree	Strongly agree	Neither	Agree	Agree	Agree	Strongly agree	Agree	Agree	Strongly Agree	Strongly Agree	Strongly Agree	Strongly Agree	Agree	Agree	Agree
2021-02-20 19:29:02	Agree	Fourth year	Agree	Agree	Agree	Agree	Agree	Agree	Neither	Agree	Agree	Neither	Agree	Agree	Neither	Neither	Agree	Disagree	Neither	Agree	Agree	Agree	Agree	Agree	Agree	Agree	Agree	Agree	Agree	Agree	Agree	Agree	Disagree	Disagree	Agree	Agree	Agree	Agree	Agree	Agree	Agree	Agree	Agree	Agree	Neither	Agree	Agree	Agree	Agree
2021-02-20 20:35:34	Agree	Third year	Strongly disagree	Strongly disagree	Strongly disagree	Strongly disagree	Strongly disagree	Strongly disagree	Strongly disagree	Strongly disagree	Strongly disagree	Strongly disagree	Strongly disagree	Strongly disagree	Strongly disagree	Strongly disagree	Strongly disagree	Strongly disagree	Strongly disagree	Strongly disagree	Strongly disagree	Strongly disagree	Strongly disagree	Strongly disagree	Strongly disagree	Strongly disagree	Strongly disagree	Strongly disagree	Strongly disagree	Strongly disagree	Strongly disagree	Strongly disagree	Strongly disagree	Strongly disagree	Strongly disagree	Strongly disagree	Strongly disagree	Strongly disagree	Strongly disagree	Strongly disagree	Strongly disagree	Strongly disagree	Strongly Disagree	Strongly Disagree	Strongly Disagree	Strongly Disagree	Strongly Disagree	Strongly Disagree	Strongly Disagree
2021-02-20 22:30:35	Agree	Fourth year	Strongly agree	Agree	Agree	Neither	Agree	Disagree	Agree	Agree	Agree	Agree	Agree	Agree	Agree	Neither	Agree	Disagree	Agree	Agree	Agree	Strongly agree	Strongly agree	Strongly agree	Strongly agree	Agree	Disagree	Agree	Agree	Agree	Agree	Agree	Strongly disagree	Disagree	Agree	Agree	Agree	Agree	Strongly agree	Agree	Neither	Agree	Strongly Agree	Strongly Agree	Strongly Agree	Agree	Agree	Agree	Agree
2021-02-21 01:28:07	Agree	Fourth year	Agree	Agree	Neither	Disagree	Disagree	Agree	Agree	Strongly Agree	Strongly agree	Disagree	Strongly agree	Agree	Agree	Disagree	Agree	Strongly disagree	Agree	Agree	Agree	Agree	Agree	Agree	Agree	Disagree	Disagree	Neither	Neither	Agree	Agree	Agree	Agree	Agree	Agree	Agree	Agree	Agree	Agree	Agree	Agree	Agree	Agree	Agree	Agree	Agree	Agree	Agree	Agree
2021-02-21 08:34:48	Agree	Fourth year	Agree	Agree	Agree	Agree	Agree	Disagree	Agree	Neither	Neithere	Agree	Neither	Neither	Neither	Disagree	Neither	Disagree	Neither	Agree	Neither	Strongly agree	Strongly agree	Agree	Strongly agree	Strongly agree	Agree	Agree	Agree	Neither	Agree	Strongly agree	Disagree	Agree	Agree	Agree	Disagree	Disagree	Disagree	Neither	Agree	Agree	Strongly Agree	Strongly Agree	Strongly Agree	Strongly Agree	Disagree	Disagree	Agree
2021-02-21 21:23:54	Agree	Fourth year	Agree	Agree	Agree	Agree	Agree	Agree	Agree	Agree	Agree	Agree	Agree	Agree	Agree	Agree	Agree	Agree	Agree	Agree	Agree	Agree	Agree	Agree	Agree	Agree	Agree	Agree	Agree	Agree	Agree	Agree	Agree	Agree	Agree	Agree	Agree	Agree	Agree	Agree	Agree	Agree	Agree	Agree	Agree	Agree	Neither	Neither	Neither
2021-02-21 21:31:16	Agree	Third year	Agree	Agree	Agree	Agree	Agree	Agree	Neither	Agree	Neithere	Agree	Agree	Agree	Agree	Agree	Agree	Agree	Agree	Agree	Agree	Agree	Agree	Agree	Agree	Agree	Agree	Agree	Agree	Agree	Agree	Strongly agree	Agree	Agree	Agree	Agree	Agree	Agree	Agree	Agree	Agree	Agree	Agree	Agree	Agree	Agree	Agree	Agree	Agree
2021-02-21 21:47:05	Agree	Third year	Agree	Agree	Neither	Neither	Agree	Agree	Agree	Agree	Agree	Neither	Neither	Neither	Agree	Neither	Neither	Neither	Strongly agree	Agree	Strongly agree	Neither	Agree	Agree	Agree	Neither	Neither	Agree	Agree	Agree	Agree	Agree	Agree	Agree	Agree	Agree	Neither	Neither	Disagree	Neither	Neither	Neither	Agree	Agree	Disagree	Neither	Neither	Neither	Agree
2021-02-21 21:55:22	Agree	Third year	Strongly agree	Agree	Strongly agree	Strongly agree	Strongly agree	Agree	Strongly agree	Strongly Agree	Strongly agree	Agree	Agree	Strongly agree	Agree	Strongly agree	Strongly agree	Strongly agree	Strongly agree	Strongly agree	Strongly agree	Neither	Strongly agree	Strongly agree	Strongly agree	Strongly agree	Strongly agree	Strongly agree	Strongly agree	Strongly agree	Strongly disagree	Strongly disagree	Strongly agree	Strongly agree	Strongly agree	Strongly agree	Strongly agree	Strongly agree	Strongly agree	Disagree	Strongly agree	Agree	Strongly Agree	Strongly Agree	Strongly Agree	Strongly Agree	Strongly Agree	Strongly Agree	Strongly Agree
2021-02-21 22:06:37	Agree	Third year	Agree	Neither	Agree	Agree	Strongly agree	Agree	Strongly agree	Strongly Agree	Strongly agree	Agree	Strongly agree	Agree	Agree	Agree	Agree	Agree	Agree	Agree	Agree	Strongly agree	Strongly agree	Strongly agree	Strongly agree	Agree	Agree	Agree	Agree	Agree	Agree	Agree	Disagree	Disagree	Agree	Strongly agree	Agree	Agree	Strongly agree	Disagree	Neither	Agree	Strongly Agree	Strongly Agree	Agree	Strongly Agree	Strongly Agree	Strongly Agree	Strongly Agree
2021-02-21 22:08:02	Agree	Third year	Agree	Agree	Strongly agree	Agree	Agree	Agree	Agree	Agree	Agree	Agree	Agree	Agree	Agree	Agree	Agree	Neither	Agree	Agree	Agree	Agree	Agree	Agree	Agree	Agree	Agree	Agree	Strongly agree	Agree	Disagree	Strongly agree	Agree	Agree	Disagree	Disagree	Neither	Agree	Agree	Agree	Agree	Neither	Agree	Neither	Agree	Strongly Agree	Disagree	Strongly Agree	Strongly Agree
2021-02-21 22:17:18	Agree	Third year	Agree	Agree	Strongly agree	Strongly agree	Agree	Neither	Strongly agree	Strongly Agree	Agree	Strongly agree	Agree	Agree	Agree	Neither	Neither	Neither	Neither	Neither	Neither	Neither	Neither	Neither	Neither	Neither	Neither	Neither	Neither	Neither	Neither	Neither	Neither	Neither	Neither	Neither	Neither	Neither	Neither	Neither	Neither	Neither	Neither	Neither	Neither	Neither	Neither	Neither	Neither
2021-02-21 22:17:32	Agree	Third year	Strongly agree	Strongly Agree	Strongly agree	Strongly agree	Strongly agree	Strongly agree	Strongly agree	Agree	Agree	Strongly agree	Agree	Agree	Strongly agree	Agree	Agree	Agree	Neither	Agree	Agree	Agree	Agree	Agree	Agree	Strongly agree	Strongly agree	Strongly agree	Strongly agree	Strongly agree	Strongly agree	Strongly agree	Strongly agree	Strongly agree	Strongly agree	Strongly agree	Strongly agree	Strongly agree	Strongly agree	Strongly agree	Strongly agree	Strongly agree	Agree	Agree	Strongly Agree	Agree	Agree	Agree	Agree
2021-02-21 22:22:19	Agree	Third year	Strongly disagree	Strongly Agree	Strongly agree	Strongly agree	Strongly agree	Strongly agree	Strongly agree	Strongly Agree	Strongly agree	Strongly agree	Strongly agree	Strongly agree	Strongly agree	Strongly disagree	Strongly agree	Strongly disagree	Strongly agree	Strongly agree	Strongly agree	Strongly agree	Strongly agree	Strongly agree	Strongly agree	Strongly agree	Strongly agree	Strongly agree	Strongly agree	Strongly agree	Strongly agree	Strongly agree	Strongly agree	Strongly agree	Strongly disagree	Strongly agree	Strongly agree	Strongly agree	Strongly agree	Strongly agree	Strongly disagree	Strongly agree	Strongly Disagree	Strongly Agree	Strongly Agree	Strongly Agree	Strongly Agree	Strongly Agree	Strongly Agree
2021-02-21 22:25:04	Agree	Third year	Strongly agree	Agree	Agree	Agree	Neither	Agree	Neither	Agree	Neithere	Agree	Agree	Neither	Strongly agree	Agree	Agree	Agree	Agree	Agree	Agree	Agree	Agree	Agree	Agree	Agree	Agree	Agree	Agree	Agree	Strongly agree	Strongly agree	Neither	Agree	Strongly agree	Strongly agree	Strongly agree	Agree	Agree	Neither	Neither	Neither	Strongly Agree	Strongly Agree	Strongly Agree	Strongly Agree	Strongly Agree	Strongly Agree	Strongly Agree
2021-02-21 22:26:59	Agree	Third year	Strongly agree	Agree	Strongly agree	Strongly agree	Agree	Strongly agree	Strongly agree	Strongly Agree	Strongly agree	Strongly agree	Strongly agree	Agree	Agree	Agree	Agree	Neither	Neither	Strongly agree	Agree	Strongly agree	Strongly agree	Agree	Agree	Agree	Strongly agree	Agree	Neither	Agree	Agree	Neither	Disagree	Disagree	Strongly agree	Strongly agree	Agree	Agree	Neither	Neither	Strongly agree	Agree	Strongly Agree	Strongly Agree	Strongly Agree	Strongly Agree	Agree	Strongly Agree	Agree
2021-02-21 22:28:38	Agree	Third year	Strongly disagree	Strongly disagree	Strongly disagree	Disagree	Disagree	Disagree	Strongly disagree	Disagree	Strongly disagree	Strongly disagree	Strongly disagree	Strongly disagree	Strongly disagree	Strongly disagree	Disagree	Disagree	Disagree	Disagree	Disagree	Disagree	Disagree	Disagree	Disagree	Disagree	Disagree	Disagree	Disagree	Disagree	Disagree	Disagree	Disagree	Disagree	Disagree	Disagree	Disagree	Strongly disagree	Strongly disagree	Strongly disagree	Strongly disagree	Strongly disagree	Strongly Disagree	Strongly Disagree	Strongly Disagree	Strongly Disagree	Strongly Disagree	Strongly Disagree	Strongly Disagree
2021-02-21 22:38:13	Agree	Third year	Agree	Agree	Agree	Agree	Agree	Agree	Agree	Agree	Agree	Agree	Agree	Agree	Agree	Agree	Agree	Agree	Agree	Agree	Agree	Agree	Agree	Agree	Agree	Agree	Agree	Agree	Agree	Agree	Agree	Agree	Agree	Agree	Agree	Agree	Agree	Agree	Agree	Agree	Agree	Agree	Agree	Agree	Agree	Agree	Agree	Agree	Agree
2021-02-21 22:41:30	Agree	Third year	Agree	Agree	Agree	Neither	Agree	Neither	Strongly agree	Agree	Agree	Agree	Agree	Agree	Agree	Agree	Agree	Strongly agree	Agree	Agree	Agree	Agree	Agree	Agree	Strongly agree	Neither	Neither	Neither	Neither	Neither	Agree	Agree	Agree	Neither	Neither	Agree	Neither	Neither	Agree	Agree	Agree	Agree	Agree	Agree	Agree	Agree	Agree	Agree	Agree
2021-02-21 22:49:06	Agree	Third year	Strongly agree	Agree	Agree	Agree	Neither	Agree	Agree	Agree	Agree	Agree	Agree	Agree	Agree	Disagree	Neither	Neither	Agree	Agree	Agree	Agree	Agree	Agree	Agree	Agree	Agree	Agree	Agree	Agree	Agree	Agree	Disagree	Disagree	Agree	Neither	Agree	Agree	Neither	Neither	Agree	Disagree	Strongly Agree	Agree	Agree	Agree	Agree	Disagree	Agree
2021-02-21 22:49:44	Agree	Third year	Strongly agree	Agree	Agree	Agree	Neither	Agree	Agree	Agree	Agree	Agree	Agree	Agree	Agree	Disagree	Neither	Neither	Agree	Agree	Agree	Agree	Agree	Agree	Agree	Agree	Agree	Agree	Agree	Agree	Agree	Agree	Disagree	Disagree	Agree	Neither	Agree	Agree	Neither	Neither	Agree	Disagree	Strongly Agree	Agree	Agree	Agree	Agree	Disagree	Agree
2021-02-21 23:44:33	Agree	Fourth year	neither	Neither	Neither	Strongly disagree	Agree	Disagree	Agree	Disagree	Agree	Neither	Neither	Strongly disagree	Disagree	Disagree	Agree	Neither	Disagree	Strongly disagree	Disagree	Strongly disagree	Agree	Neither	Neither	Neither	Neither	Neither	Neither	Agree	Agree	Agree	Agree	Agree	Agree	Agree	Agree	Disagree	Strongly agree	Strongly disagree	Agree	Disagree	Neither	Disagree	Agree	Neither	Neither	Neither	Agree
2021-02-22 01:13:14	Agree	Third year	Agree	Agree	Agree	Agree	Agree	Agree	Agree	Agree	Agree	Agree	Agree	Agree	Agree	Agree	Agree	Agree	Agree	Agree	Agree	Agree	Agree	Agree	Agree	Agree	Agree	Agree	Agree	Agree	Agree	Agree	Agree	Agree	Agree	Agree	Agree	Agree	Agree	Agree	Agree	Agree	Agree	Agree	Agree	Agree	Agree	Agree	Agree
2021-02-22 01:54:09	Agree	Fourth year	neither	Neither	Neither	Strongly disagree	Agree	Disagree	Agree	Disagree	Agree	Neither	Neither	Strongly disagree	Disagree	Disagree	Agree	Neither	Disagree	Strongly disagree	Disagree	Strongly disagree	Agree	Neither	Neither	Neither	Neither	Neither	Neither	Agree	Agree	Agree	Agree	Agree	Agree	Agree	Agree	Disagree	Strongly agree	Strongly disagree	Agree	Disagree	Neither	Disagree	Agree	Neither	Neither	Neither	Agree
2021-02-22 08:00:41	Agree	Third year	Strongly disagree	Strongly disagree	Strongly disagree	Disagree	Disagree	Disagree	Strongly disagree	Disagree	Strongly disagree	Strongly disagree	Strongly disagree	Strongly disagree	Strongly disagree	Strongly disagree	Disagree	Disagree	Disagree	Disagree	Disagree	Disagree	Disagree	Disagree	Disagree	Disagree	Disagree	Disagree	Disagree	Disagree	Disagree	Disagree	Disagree	Disagree	Disagree	Disagree	Disagree	Strongly disagree	Strongly disagree	Strongly disagree	Strongly disagree	Strongly disagree	Strongly Disagree	Strongly Disagree	Strongly Disagree	Strongly Disagree	Strongly Disagree	Strongly Disagree	Strongly Disagree
2021-02-22 08:17:35	Agree	Third year	Agree	Agree	Agree	Agree	Agree	Agree	Neither	Agree	Neithere	Agree	Agree	Agree	Agree	Agree	Agree	Agree	Agree	Agree	Agree	Agree	Agree	Agree	Agree	Agree	Agree	Agree	Agree	Agree	Agree	Strongly agree	Agree	Agree	Agree	Agree	Agree	Agree	Agree	Agree	Agree	Agree	Agree	Agree	Agree	Agree	Agree	Agree	Agree
2021-02-22 08:23:21	Agree	Third year	Strongly agree	Agree	Agree	Agree	Agree	Agree	Agree	Agree	Agree	Agree	Agree	Agree	Agree	Neither	Agree	Disagree	Agree	Agree	Agree	Agree	Agree	Agree	Agree	Agree	Agree	Agree	Agree	Agree	Agree	Neither	Agree	Agree	Agree	Agree	Agree	Agree	Agree	Agree	Agree	Agree	Agree	Agree	Agree	Agree	Agree	Agree	Agree
2021-02-22 12:41:17	Agree	Third year	Strongly agree	Agree	Strongly agree	Agree	Neither	Strongly agree	Strongly agree	Strongly Agree	Strongly agree	Strongly agree	Strongly agree	Strongly agree	Strongly agree	Strongly agree	Agree	Agree	Strongly agree	Strongly agree	Strongly agree	Strongly agree	Strongly agree	Strongly agree	Agree	Agree	Strongly agree	Strongly agree	Agree	Agree	Agree	Neither	Agree	Agree	Agree	Agree	Strongly agree	Strongly agree	Agree	Agree	Agree	Agree	Agree	Agree	Agree	Strongly Agree	Strongly Agree	Strongly Agree	Strongly Agree
2021-02-22 15:45:47	Agree	Third year	Agree	Agree	Agree	Agree	Agree	Agree	Agree	Agree	Agree	Agree	Agree	Agree	Agree	Agree	Agree	Agree	Agree	Agree	Agree	Agree	Agree	Agree	Agree	Agree	Agree	Agree	Agree	Agree	Agree	Agree	Agree	Agree	Agree	Agree	Agree	Agree	Agree	Agree	Agree	Agree	Agree	Agree	Agree	Agree	Agree	Agree	Agree
2021-02-22 17:24:51	Agree	Third year	Agree	Neither	Agree	Agree	Strongly agree	Agree	Strongly agree	Strongly Agree	Strongly agree	Agree	Strongly agree	Agree	Agree	Agree	Agree	Agree	Agree	Agree	Agree	Strongly agree	Strongly agree	Strongly agree	Strongly agree	Agree	Agree	Agree	Agree	Agree	Agree	Agree	Disagree	Disagree	Agree	Strongly agree	Agree	Agree	Strongly agree	Disagree	Neither	Agree	Strongly Agree	Strongly Agree	Agree	Strongly Agree	Strongly Agree	Strongly Agree	Strongly Agree
2021-02-22 21:00:53	Agree	Fourth year	Agree	Agree	Agree	Agree	Agree	Agree	Agree	Neither	Agree	Agree	Agree	Agree	Agree	Disagree	Agree	Neither	Neither	Agree	Agree	Agree	Agree	Neither	Agree	Agree	Agree	Agree	Agree	Strongly agree	Agree	Strongly agree	Agree	Disagree	Agree	Neither	Neither	Agree	Neither	Agree	Agree	Agree	Agree	Agree	Agree	Agree	Agree	Neither	Agree
2021-02-22 22:10:13	Agree	Fourth year	Strongly agree	Strongly Agree	Strongly agree	Strongly agree	Agree	Strongly agree	Strongly agree	Strongly Agree	Strongly agree	Strongly agree	Strongly agree	Strongly agree	Strongly agree	Agree	Strongly agree	Agree	Strongly agree	Strongly agree	Strongly agree	Strongly agree	Strongly agree	Strongly agree	Strongly agree	Strongly agree	Strongly agree	Strongly agree	Strongly agree	Strongly agree	Strongly agree	Strongly agree	Strongly disagree	Strongly disagree	Strongly agree	Agree	Agree	Strongly agree	Strongly agree	Strongly agree	Agree	Strongly agree	Strongly Agree	Strongly Agree	Strongly Agree	Strongly Agree	Strongly Agree	Strongly Agree	Strongly Agree
2021-02-23 06:38:11	Agree	Fourth year	Agree	Agree	Agree	Agree	Agree	Agree	Agree	Agree	Agree	Agree	Agree	Agree	Agree	Agree	Agree	Agree	Neither	Neither	Agree	Agree	Agree	Neither	Agree	Agree	Agree	Agree	Agree	Agree	Agree	Neither	Agree	Agree	Agree	Agree	Agree	Agree	Agree	Agree	Agree	Agree	Agree	Agree	Agree	Neither	Neither	Neither	Neither
2021-02-23 12:48:31	Agree	Third year	Agree	Strongly Agree	Agree	Strongly agree	Strongly agree	Strongly agree	Agree	Neither	Agree	Agree	Agree	Neither	Agree	Neither	Disagree	Strongly agree	Neither	Strongly agree	Strongly agree	Strongly agree	Strongly agree	Strongly agree	Strongly agree	Agree	Strongly agree	Strongly agree	Agree	Strongly agree	Strongly agree	Strongly agree	Disagree	Strongly disagree	Strongly agree	Agree	Agree	Agree	Agree	Agree	Strongly agree	Neither	Strongly Agree	Agree	Strongly Agree	Strongly Agree	Strongly Agree	Strongly Agree	Strongly Agree
2021-02-23 20:06:26	Agree	Fourth year	Strongly agree	Strongly Agree	Strongly agree	Strongly agree	Strongly agree	Strongly agree	Strongly agree	Strongly Agree	Strongly agree	Strongly agree	Strongly agree	Strongly agree	Strongly agree	Strongly agree	Strongly agree	Agree	Neither	Agree	Strongly agree	Strongly agree	Strongly agree	Strongly agree	Strongly agree	Strongly agree	Strongly agree	Strongly agree	Strongly agree	Strongly agree	Strongly agree	Strongly agree	Strongly agree	Strongly agree	Strongly agree	Disagree	Strongly agree	Strongly agree	Strongly agree	Strongly agree	Strongly agree	Strongly agree	Disagree	Agree	Agree	Strongly Agree	Strongly Agree	Strongly Agree	Strongly Agree
2021-02-23 20:13:22	Agree	Fourth year	Agree	Agree	Agree	Agree	Agree	Strongly agree	Agree	Agree	Agree	Neither	Neither	Agree	Agree	Neither	Neither	Disagree	Agree	Strongly agree	Agree	Strongly agree	Strongly agree	Strongly agree	Agree	Agree	Agree	Agree	Agree	Agree	Agree	Neither	Disagree	Strongly disagree	Neither	Agree	Agree	Strongly agree	Agree	Neither	Agree	Agree	Strongly Agree	Strongly Agree	Agree	Agree	Agree	Strongly Agree	Agree
2021-02-23 20:28:40	Agree	Fourth year	Strongly agree	Strongly Agree	Strongly agree	Strongly agree	Strongly agree	Strongly agree	Strongly agree	Strongly Agree	Strongly agree	Strongly agree	Strongly agree	Strongly agree	Strongly agree	Strongly agree	Strongly agree	Strongly agree	Strongly agree	Strongly agree	Strongly agree	Strongly agree	Strongly agree	Strongly agree	Strongly agree	Strongly agree	Strongly agree	Strongly agree	Strongly agree	Strongly agree	Strongly agree	Strongly agree	Strongly agree	Strongly agree	Strongly agree	Strongly agree	Strongly agree	Strongly agree	Strongly agree	Strongly agree	Strongly agree	Strongly agree	Strongly Agree	Strongly Agree	Strongly Agree	Strongly Agree	Strongly Agree	Strongly Agree	Strongly Agree
2021-02-23 21:01:18	Agree	Third year	Strongly agree	Agree	Strongly agree	Strongly agree	Strongly agree	Strongly agree	Strongly agree	Strongly Agree	Strongly agree	Strongly agree	Strongly agree	Strongly agree	Disagree	Agree	Agree	Agree	Strongly agree	Strongly agree	Agree	Strongly agree	Strongly agree	Strongly agree	Strongly agree	Strongly agree	Strongly agree	Strongly agree	Strongly agree	Strongly agree	Strongly agree	Neither	Neither	Strongly disagree	Strongly agree	Strongly agree	Neither	Agree	Agree	Neither	Neither	Neither	Strongly Agree	Strongly Agree	Strongly Agree	Strongly Agree	Strongly Agree	Strongly Agree	Strongly Agree
2021-02-23 21:13:00	Agree	Third year	Strongly agree	Agree	Agree	Agree	Neither	Agree	Strongly agree	Agree	Agree	Neither	Agree	Strongly disagree	Strongly agree	Neither	Neither	Disagree	Agree	Neither	Agree	Strongly agree	Agree	Agree	Agree	Neither	Neither	Agree	Agree	Agree	Strongly agree	Agree	Disagree	Disagree	Neither	Agree	Neither	Agree	Agree	Agree	Neither	Neither	Strongly Agree	Strongly Agree	Disagree	Strongly Agree	Strongly Agree	Strongly Agree	Strongly Agree
2021-02-23 21:25:41	Agree	Third year	Strongly agree	Strongly Agree	Strongly agree	Agree	Strongly agree	Strongly agree	Strongly disagree	Agree	Strongly agree	Disagree	Neither	Strongly agree	Neither	Strongly agree	Strongly disagree	Disagree	Agree	Agree	Neither	Agree	Agree	Agree	Agree	Strongly agree	Strongly agree	Strongly agree	Strongly agree	Strongly agree	Strongly agree	Strongly agree	Strongly agree	Strongly disagree	Disagree	Strongly agree	Strongly agree	Strongly agree	Strongly agree	Strongly agree	Agree	Neither	Strongly Agree	Strongly Disagree	Strongly Disagree	Disagree	Strongly Agree	Strongly Agree	Agree
2021-02-23 21:29:24	Agree	Third year	Agree	Agree	Neither	Neither	Agree	Agree	Agree	Agree	Agree	Neither	Neither	Neither	Agree	Neither	Neither	Neither	Strongly agree	Agree	Strongly agree	Neither	Agree	Agree	Agree	Neither	Neither	Agree	Agree	Agree	Agree	Agree	Agree	Agree	Agree	Agree	Neither	Neither	Disagree	Neither	Neither	Neither	Agree	Agree	Disagree	Neither	Neither	Neither	Agree
2021-02-23 21:32:51	Agree	Third year	Strongly agree	Strongly Agree	Strongly agree	Agree	Strongly agree	Strongly agree	Strongly disagree	Agree	Strongly agree	Disagree	Neither	Strongly agree	Neither	Strongly agree	Strongly disagree	Disagree	Agree	Agree	Neither	Agree	Agree	Agree	Agree	Strongly agree	Strongly agree	Strongly agree	Strongly agree	Strongly agree	Strongly agree	Strongly agree	Strongly agree	Strongly disagree	Disagree	Strongly agree	Strongly agree	Strongly agree	Strongly agree	Strongly agree	Agree	Neither	Strongly Agree	Strongly Disagree	Strongly Disagree	Disagree	Strongly Agree	Strongly Agree	Agree
2021-02-23 21:59:36	Agree	Fourth year	Strongly agree	Strongly Agree	Strongly agree	Strongly agree	Strongly agree	Strongly agree	Strongly agree	Strongly Agree	Strongly agree	Strongly agree	Strongly agree	Strongly agree	Strongly agree	Strongly agree	Strongly agree	Agree	Neither	Agree	Strongly agree	Strongly agree	Strongly agree	Strongly agree	Strongly agree	Strongly agree	Strongly agree	Strongly agree	Strongly agree	Strongly agree	Strongly agree	Strongly agree	Strongly agree	Strongly agree	Strongly agree	Disagree	Strongly agree	Strongly agree	Strongly agree	Strongly agree	Strongly agree	Strongly agree	Disagree	Agree	Agree	Strongly Agree	Strongly Agree	Strongly Agree	Strongly Agree
2021-02-23 22:01:09	Agree	Third year	Strongly agree	Strongly Agree	Strongly agree	Agree	Strongly agree	Strongly agree	Strongly disagree	Agree	Strongly agree	Disagree	Neither	Strongly agree	Neither	Strongly agree	Strongly disagree	Disagree	Agree	Agree	Neither	Agree	Agree	Agree	Agree	Strongly agree	Strongly agree	Strongly agree	Strongly agree	Strongly agree	Strongly agree	Strongly agree	Strongly agree	Strongly disagree	Disagree	Strongly agree	Strongly agree	Strongly agree	Strongly agree	Strongly agree	Agree	Neither	Strongly Agree	Strongly Disagree	Strongly Disagree	Disagree	Strongly Agree	Strongly Agree	Agree
2021-02-23 22:10:17	Agree	Fourth year	Strongly agree	Strongly Agree	Strongly agree	Strongly agree	Strongly agree	Strongly agree	Strongly agree	Strongly Agree	Strongly agree	Neither	Strongly agree	Strongly agree	Strongly agree	Strongly agree	Strongly agree	Disagree	Strongly agree	Disagree	Strongly agree	Strongly agree	Strongly agree	Strongly agree	Agree	Strongly agree	Neither	Strongly agree	Strongly agree	Disagree	Strongly agree	Strongly agree	Strongly disagree	Strongly disagree	Strongly disagree	Strongly agree	Agree	Strongly agree	Strongly agree	Strongly agree	Agree	Strongly agree	Agree	Neither	Neither	Strongly Agree	Strongly Agree	Strongly Agree	Strongly Agree
2021-02-23 23:24:39	Agree	Third year	Strongly agree	Strongly Agree	Strongly agree	Agree	Agree	Strongly agree	Strongly agree	Strongly Agree	Strongly agree	Strongly agree	Neither	Agree	Strongly agree	Strongly agree	Strongly agree	Strongly agree	Strongly agree	Strongly agree	Disagree	Strongly agree	Strongly agree	Strongly agree	Strongly agree	Strongly agree	Strongly agree	Strongly agree	Strongly agree	Strongly agree	Strongly agree	Strongly agree	Strongly agree	Strongly agree	Strongly agree	Strongly agree	Strongly agree	Disagree	Strongly agree	Strongly agree	Strongly agree	Strongly agree	Strongly Agree	Strongly Agree	Strongly Agree	Neither	Strongly Agree	Neither	Neither
2021-02-23 23:26:47	Agree	Third year	Agree	Agree	Agree	Neither	Agree	Neither	Agree	Agree	Agree	Neither	Agree	Agree	Agree	Disagree	Agree	Neither	Agree	Strongly agree	Agree	Agree	Strongly agree	Agree	Strongly agree	Strongly agree	Agree	Strongly agree	Agree	Agree	Agree	Strongly agree	Neither	Neither	Strongly agree	Neither	Agree	Agree	Strongly agree	Agree	Agree	Agree	Strongly Agree	Strongly Agree	Neither	Strongly Agree	Agree	Neither	Neither
2021-02-23 23:59:13	Agree	Third year	Strongly agree	Strongly Agree	Strongly agree	Agree	Agree	Strongly agree	Strongly agree	Strongly Agree	Strongly agree	Strongly agree	Neither	Agree	Strongly agree	Strongly agree	Strongly agree	Strongly agree	Strongly agree	Strongly agree	Disagree	Strongly agree	Strongly agree	Strongly agree	Strongly agree	Strongly agree	Strongly agree	Strongly agree	Strongly agree	Strongly agree	Strongly agree	Strongly agree	Strongly agree	Strongly agree	Strongly agree	Strongly agree	Strongly agree	Disagree	Strongly agree	Strongly agree	Strongly agree	Strongly agree	Strongly Agree	Strongly Agree	Strongly Agree	Neither	Strongly Agree	Neither	Neither
2021-02-23 23:59:14	Agree	Third year	Strongly agree	Strongly Agree	Strongly agree	Agree	Agree	Agree	Strongly agree	Strongly Agree	Strongly agree	Strongly agree	Strongly agree	Strongly agree	Strongly agree	Strongly agree	Agree	Agree	Agree	Agree	Agree	Agree	Agree	Strongly agree	Agree	Agree	Agree	Strongly agree	Agree	Strongly agree	Agree	Strongly agree	Strongly agree	Strongly agree	Strongly agree	Agree	Agree	Agree	Agree	Agree	Agree	Agree	Agree	Agree	Strongly Agree	Strongly Agree	Strongly Agree	Strongly Agree	Strongly Agree
2021-02-24 00:11:58	Agree	Third year	Strongly disagree	Strongly disagree	Strongly disagree	Strongly disagree	Strongly disagree	Strongly disagree	Strongly disagree	Strongly disagree	Strongly disagree	Strongly disagree	Strongly disagree	Strongly disagree	Strongly disagree	Strongly disagree	Strongly disagree	Strongly disagree	Strongly disagree	Strongly disagree	Strongly disagree	Strongly disagree	Strongly disagree	Strongly disagree	Strongly disagree	Strongly disagree	Strongly disagree	Strongly disagree	Strongly disagree	Strongly disagree	Strongly disagree	Strongly disagree	Strongly disagree	Strongly disagree	Strongly disagree	Strongly disagree	Strongly disagree	Strongly disagree	Strongly disagree	Strongly disagree	Strongly disagree	Strongly disagree	Strongly Disagree	Strongly Disagree	Strongly Disagree	Strongly Disagree	Disagree	Neither	Agree
2021-02-24 00:18:33	Agree	Third year	Agree	Agree	Agree	Agree	Agree	Agree	Agree	Agree	Agree	Strongly agree	Agree	Agree	Agree	Neither	Neither	Agree	Agree	Agree	Agree	Agree	Agree	Agree	Agree	Neither	Agree	Agree	Strongly agree	Agree	Agree	Agree	Agree	Agree	Neither	Disagree	Neither	Neither	Agree	Neither	Neither	Neither	Agree	Agree	Agree	Agree	Agree	Agree	Agree
2021-02-24 00:18:41	Agree	Third year	Agree	Agree	Neither	Disagree	Neither	Neither	Agree	Agree	Agree	Agree	Agree	Agree	Agree	Agree	Agree	Agree	Agree	Agree	Agree	Agree	Agree	Agree	Agree	Agree	Agree	Agree	Neither	Neither	Neither	Agree	Neither	Agree	Agree	Agree	Agree	Agree	Agree	Agree	Agree	Agree	Agree	Agree	Neither	Neither	Neither	Neither	Neither
2021-02-24 00:32:09	Agree	Third year	Strongly agree	Strongly Agree	Strongly agree	Strongly agree	Strongly agree	Strongly agree	Strongly agree	Strongly Agree	Strongly agree	Agree	Strongly agree	Strongly agree	Strongly agree	Agree	Agree	Agree	Agree	Strongly agree	Strongly agree	Agree	Agree	Agree	Agree	Agree	Agree	Agree	Agree	Agree	Agree	Agree	Agree	Agree	Agree	Agree	Agree	Agree	Agree	Strongly agree	Agree	Agree	Strongly Agree	Strongly Agree	Strongly Agree	Strongly Agree	Strongly Agree	Strongly Agree	Strongly Agree
2021-02-24 00:32:31	Agree	Third year	Agree	Strongly Agree	Agree	Agree	Agree	Agree	Agree	Agree	Agree	Agree	Agree	Agree	Agree	Agree	Agree	Agree	Agree	Agree	Agree	Agree	Agree	Agree	Agree	Agree	Agree	Agree	Agree	Strongly agree	Strongly agree	Strongly agree	Disagree	Disagree	Agree	Agree	Agree	Agree	Agree	Agree	Strongly agree	Strongly agree	Agree	Agree	Agree	Agree	Agree	Agree	Agree
2021-02-24 08:01:05	Agree	Third year	Strongly agree	Strongly Agree	Strongly agree	Agree	Agree	Agree	Strongly agree	Strongly Agree	Strongly agree	Strongly agree	Strongly agree	Strongly agree	Strongly agree	Strongly agree	Agree	Agree	Agree	Agree	Agree	Agree	Agree	Strongly agree	Agree	Agree	Agree	Strongly agree	Agree	Strongly agree	Agree	Strongly agree	Strongly agree	Strongly agree	Strongly agree	Agree	Agree	Agree	Agree	Agree	Agree	Agree	Agree	Agree	Strongly Agree	Strongly Agree	Strongly Agree	Strongly Agree	Strongly Agree
2021-02-24 08:11:23	Agree	Third year	Agree	Agree	Neither	Disagree	Neither	Neither	Agree	Agree	Agree	Agree	Agree	Agree	Agree	Agree	Agree	Agree	Agree	Agree	Agree	Agree	Agree	Agree	Agree	Agree	Agree	Agree	Neither	Neither	Neither	Agree	Neither	Agree	Agree	Agree	Agree	Agree	Agree	Agree	Agree	Agree	Agree	Agree	Neither	Neither	Neither	Neither	Neither
2021-02-24 13:25:00	Agree	Fourth year	Agree	Agree	Agree	Agree	Agree	Strongly agree	Agree	Agree	Agree	Neither	Neither	Agree	Agree	Neither	Neither	Disagree	Agree	Strongly agree	Agree	Strongly agree	Strongly agree	Strongly agree	Agree	Agree	Agree	Agree	Agree	Agree	Agree	Neither	Disagree	Strongly disagree	Neither	Agree	Agree	Strongly agree	Agree	Neither	Agree	Agree	Strongly Agree	Strongly Agree	Agree	Agree	Agree	Strongly Agree	Agree
2021-02-24 13:29:13	Agree	Third year	Agree	Agree	Agree	Neither	Agree	Neither	Agree	Agree	Agree	Neither	Agree	Agree	Agree	Disagree	Agree	Neither	Agree	Strongly agree	Agree	Agree	Strongly agree	Agree	Strongly agree	Strongly agree	Agree	Strongly agree	Agree	Agree	Agree	Strongly agree	Neither	Neither	Strongly agree	Neither	Agree	Agree	Strongly agree	Agree	Agree	Agree	Strongly Agree	Strongly Agree	Neither	Strongly Agree	Agree	Neither	Neither
2021-02-24 14:17:08	Agree	Third year	Strongly disagree	Strongly disagree	Strongly disagree	Strongly disagree	Strongly disagree	Strongly disagree	Strongly disagree	Strongly disagree	Strongly disagree	Strongly disagree	Strongly disagree	Strongly disagree	Strongly disagree	Strongly disagree	Strongly disagree	Strongly disagree	Strongly disagree	Strongly disagree	Strongly disagree	Strongly disagree	Strongly disagree	Strongly disagree	Strongly disagree	Strongly disagree	Strongly disagree	Strongly disagree	Strongly disagree	Strongly disagree	Strongly disagree	Strongly disagree	Strongly disagree	Strongly disagree	Strongly disagree	Strongly disagree	Strongly disagree	Strongly disagree	Strongly disagree	Strongly disagree	Strongly disagree	Strongly disagree	Strongly Disagree	Strongly Disagree	Strongly Disagree	Strongly Disagree	Disagree	Neither	Agree
2021-02-24 14:24:07	Agree	Third year	Strongly agree	Strongly Agree	Strongly agree	Agree	Agree	Strongly agree	Strongly agree	Strongly Agree	Strongly agree	Strongly agree	Neither	Agree	Strongly agree	Strongly agree	Strongly agree	Strongly agree	Strongly agree	Strongly agree	Disagree	Strongly agree	Strongly agree	Strongly agree	Strongly agree	Strongly agree	Strongly agree	Strongly agree	Strongly agree	Strongly agree	Strongly agree	Strongly agree	Strongly agree	Strongly agree	Strongly agree	Strongly agree	Strongly agree	Disagree	Strongly agree	Strongly agree	Strongly agree	Strongly agree	Strongly Agree	Strongly Agree	Strongly Agree	Neither	Strongly Agree	Neither	Neither
2021-02-24 20:22:47	Agree	Fourth year	Strongly agree	Strongly Agree	Strongly agree	Strongly agree	Strongly agree	Strongly agree	Strongly agree	Strongly Agree	Strongly agree	Neither	Strongly agree	Strongly agree	Strongly agree	Strongly agree	Strongly agree	Disagree	Strongly agree	Disagree	Strongly agree	Strongly agree	Strongly agree	Strongly agree	Agree	Strongly agree	Neither	Strongly agree	Strongly agree	Disagree	Strongly agree	Strongly agree	Strongly disagree	Strongly disagree	Strongly disagree	Strongly agree	Agree	Strongly agree	Strongly agree	Strongly agree	Agree	Strongly agree	Agree	Neither	Neither	Strongly Agree	Strongly Agree	Strongly Agree	Strongly Agree
2021-02-25 09:19:13	Agree	Fourth year	Strongly agree	Strongly Agree	Strongly agree	Strongly agree	Strongly agree	Strongly agree	Strongly agree	Strongly Agree	Strongly agree	Strongly agree	Strongly agree	Strongly agree	Strongly agree	Strongly agree	Strongly agree	Strongly agree	Strongly agree	Strongly agree	Strongly agree	Strongly agree	Strongly agree	Strongly agree	Strongly agree	Strongly agree	Strongly agree	Strongly agree	Strongly agree	Strongly agree	Strongly agree	Strongly agree	Strongly agree	Strongly agree	Strongly agree	Strongly agree	Strongly agree	Strongly agree	Strongly agree	Strongly agree	Strongly agree	Strongly agree	Strongly Agree	Strongly Agree	Strongly Agree	Strongly Agree	Strongly Agree	Strongly Agree	Strongly Agree
2021-02-25 11:04:26	Agree	Fourth year	Strongly agree	Strongly Agree	Strongly agree	Strongly agree	Strongly agree	Strongly agree	Strongly agree	Strongly Agree	Strongly agree	Strongly agree	Strongly agree	Strongly agree	Strongly agree	Strongly agree	Strongly agree	Strongly agree	Strongly agree	Strongly agree	Strongly agree	Strongly agree	Strongly agree	Strongly agree	Strongly agree	Strongly agree	Strongly agree	Strongly agree	Strongly agree	Strongly agree	Strongly agree	Strongly agree	Strongly agree	Strongly agree	Strongly agree	Strongly agree	Strongly agree	Strongly agree	Strongly agree	Strongly agree	Strongly agree	Strongly agree	Strongly Agree	Strongly Agree	Strongly Agree	Strongly Agree	Strongly Agree	Strongly Agree	Strongly Agree
2021-02-28 07:03:58	Agree	Third year	Strongly disagree	Strongly disagree	Strongly disagree	Strongly disagree	Strongly disagree	Strongly disagree	Strongly disagree	Strongly disagree	Strongly disagree	Strongly disagree	Strongly disagree	Strongly disagree	Strongly disagree	Strongly disagree	Strongly disagree	Strongly disagree	Strongly disagree	Strongly disagree	Strongly disagree	Strongly disagree	Strongly disagree	Strongly disagree	Strongly disagree	Strongly disagree	Strongly disagree	Strongly disagree	Strongly disagree	Strongly disagree	Strongly disagree	Strongly disagree	Strongly disagree	Strongly disagree	Strongly disagree	Strongly disagree	Strongly disagree	Strongly disagree	Strongly disagree	Strongly disagree	Strongly disagree	Strongly disagree	Strongly Disagree	Strongly Disagree	Strongly Disagree	Strongly Disagree	Disagree	Neither	Agree
2021-02-28 19:55:06	Agree	Third year	Strongly agree	Agree	Strongly agree	Agree	Agree	Agree	Agree	Agree	Agree	Agree	Agree	Agree	Agree	Neither	Agree	Neither	Agree	Agree	Agree	Agree	Strongly agree	Strongly agree	Agree	Agree	Agree	Agree	Agree	Agree	Strongly agree	Disagree	Disagree	Disagree	Strongly agree	Agree	Agree	Agree	Strongly agree	Strongly agree	Agree	Agree	Strongly Agree	Strongly Agree	Strongly Agree	Strongly Agree	Agree	Strongly Agree	Strongly Agree
2021-03-02 04:42:01	Agree	Fourth year	Agree	Strongly Agree	Strongly agree	Agree	Agree	Strongly agree	Strongly agree	Disagree	Disagree	Agree	Agree	Agree	Agree	Disagree	Neither	Neither	Agree	Agree	Neither	Agree	Agree	Agree	Agree	Strongly agree	Agree	Strongly agree	Strongly agree	Strongly agree	Strongly agree	Strongly agree	Strongly disagree	Strongly disagree	Strongly agree	Agree	Agree	Agree	Strongly agree	Strongly agree	Strongly agree	Strongly agree	Strongly Agree	Strongly Agree	Strongly Agree	Strongly Agree	Strongly Agree	Strongly Agree	Strongly Agree
2021-03-06 22:42:32	Agree	Fourth year	Agree	Agree	Agree	Agree	Agree	Neither	Strongly agree	Neither	Neithere	Disagree	Agree	Agree	Agree	Agree	Neither	Strongly agree	Agree	Agree	Agree	Agree	Agree	Agree	Neither	Agree	Neither	Agree	Agree	Strongly agree	Strongly agree	Neither	Disagree	Strongly disagree	Neither	Neither	Neither	Agree	Neither	Agree	Disagree	Agree	Strongly Agree	Agree	Agree	Agree	Neither	Strongly Agree	Strongly Agree
2021-03-08 14:55:33	Agree	Fourth year	Agree	Neither	Agree	Agree	Agree	Agree	Disagree	Agree	Agree	Agree	Agree	Agree	Agree	Disagree	Neither	Agree	Agree	Agree	Agree	Agree	Disagree	Disagree	Agree	Neither	Agree	Disagree	Agree	Neither	Agree	Agree	Agree	Disagree	Agree	Agree	Agree	Agree	Disagree	Agree	Agree	Agree	Agree	Agree	Agree	Agree	Agree	Agree	Agree
2021-03-08 23:18:55	Agree	Fourth year	Agree	Neither	Agree	Agree	Agree	Agree	Disagree	Agree	Agree	Agree	Agree	Agree	Agree	Disagree	Neither	Agree	Agree	Agree	Agree	Agree	Disagree	Disagree	Agree	Neither	Agree	Disagree	Agree	Neither	Agree	Agree	Agree	Disagree	Agree	Agree	Agree	Agree	Disagree	Agree	Agree	Agree	Agree	Agree	Agree	Agree	Agree	Agree	Agree
2021-03-10 16:18:55	Agree	Third year	Agree	Agree	Agree	Strongly agree	Strongly agree	Strongly agree	Agree	Agree	Agree	Strongly agree	Strongly agree	Strongly agree	Strongly agree	Neither	Agree	Disagree	Agree	Agree	Agree	Strongly agree	Strongly agree	Agree	Strongly agree	Strongly agree	Strongly agree	Strongly agree	Agree	Agree	Agree	Neither	Disagree	Disagree	Agree	Neither	Agree	Neither	Strongly agree	Agree	Neither	Agree	Strongly Agree	Strongly Agree	Agree	Agree	Strongly Agree	Strongly Agree	Strongly Agree
2021-03-10 16:32:05	Agree	Fourth year	Agree	Agree	Strongly agree	Agree	Strongly agree	Neither	Neither	Agree	Agree	Agree	Agree	Agree	Disagree	Agree	Agree	Agree	Agree	Strongly agree	Strongly agree	Strongly agree	Strongly agree	Strongly agree	Agree	Strongly agree	Agree	Agree	Agree	Strongly agree	Strongly agree	Strongly agree	Strongly disagree	Disagree	Disagree	Strongly agree	Strongly agree	Strongly agree	Strongly agree	Agree	Agree	Strongly agree	Agree	Disagree	Strongly Agree	Strongly Agree	Agree	Strongly Agree	Strongly Agree
2021-03-10 23:50:23	Agree	Fourth year	Agree	Agree	Agree	Agree	Agree	Agree	Agree	Agree	Agree	Agree	Agree	Agree	Agree	Agree	Strongly agree	Strongly agree	Strongly agree	Strongly agree	Strongly agree	Strongly agree	Strongly agree	Strongly agree	Neither	Neither	Agree	Agree	Agree	Agree	Agree	Agree	Agree	Agree	Agree	Agree	Agree	Agree	Agree	Agree	Agree	Agree	Agree	Agree	Agree	Agree	Agree	Agree	Agree
2021-03-11 01:20:26	Agree	Fourth year	Disagree	Strongly Agree	Agree	Agree	Disagree	Disagree	Disagree	Disagree	Disagree	Disagree	Agree	Agree	Agree	Disagree	Disagree	Agree	Disagree	Agree	Disagree	Agree	Agree	Agree	Agree	Agree	Agree	Agree	Agree	Disagree	Agree	Disagree	Agree	Agree	Disagree	Agree	Agree	Agree	Agree	Agree	Agree	Agree	Agree	Agree	Agree	Agree	Agree	Disagree	Disagree
2021-03-11 11:48:04	Agree	Third year	Agree	Agree	Agree	Agree	Agree	Agree	Agree	Agree	Agree	Agree	Agree	Agree	Agree	Agree	Agree	Agree	Agree	Agree	Agree	Agree	Agree	Agree	Agree	Agree	Agree	Agree	Agree	Agree	Agree	Agree	Agree	Agree	Agree	Agree	Agree	Agree	Agree	Agree	Agree	Agree	Agree	Agree	Agree	Agree	Agree	Agree	Agree
2021-03-11 11:49:43	Agree	Third year	Agree	Agree	Agree	Agree	Agree	Agree	Strongly agree	Strongly Agree	Strongly agree	Agree	Strongly agree	Agree	Strongly agree	Neither	Neither	Agree	Agree	Strongly agree	Agree	Strongly agree	Strongly agree	Strongly agree	Strongly agree	Agree	Strongly agree	Strongly agree	Strongly agree	Strongly agree	Strongly agree	Strongly agree	Strongly agree	Strongly agree	Neither	Neither	Agree	Agree	Strongly agree	Agree	Neither	Neither	Strongly Agree	Strongly Agree	Disagree	Strongly Agree	Strongly Agree	Strongly Agree	Agree
2021-03-11 11:54:35	Agree	Third year	Strongly agree	Strongly Agree	Strongly agree	Strongly agree	Strongly agree	Strongly agree	Strongly agree	Strongly Agree	Strongly agree	Strongly agree	Strongly agree	Strongly agree	Strongly agree	Disagree	Disagree	Agree	Agree	Agree	Agree	Agree	Agree	Agree	Agree	Agree	Neither	Agree	Agree	Agree	Agree	Agree	Agree	Agree	Agree	Strongly agree	Agree	Agree	Agree	Agree	Agree	Strongly agree	Strongly Agree	Strongly Agree	Strongly Agree	Strongly Agree	Strongly Agree	Strongly Agree	Strongly Agree
2021-03-11 11:58:27	Agree	Third year	Agree	Agree	Agree	Agree	Strongly agree	Strongly agree	Strongly agree	Strongly Agree	Strongly agree	Strongly agree	Strongly agree	Strongly agree	Strongly agree	Neither	Neither	Agree	Strongly agree	Agree	Agree	Agree	Agree	Strongly agree	Neither	Neither	Neither	Neither	Neither	Neither	Neither	Agree	Agree	Agree	Agree	Agree	Strongly agree	Strongly agree	Neither	Agree	Neither	Neither	Strongly Agree	Strongly Agree	Strongly Agree	Strongly Agree	Neither	Agree	Strongly Agree
2021-03-11 12:06:25	Agree	Third year	Strongly agree	Agree	Strongly agree	Strongly agree	Agree	Agree	Agree	Agree	Agree	Agree	Agree	Strongly agree	Strongly agree	Strongly agree	Agree	Strongly agree	Strongly agree	Agree	Strongly agree	Agree	Strongly agree	Strongly agree	Strongly agree	Agree	Strongly agree	Strongly agree	Strongly agree	Strongly agree	Strongly agree	Strongly agree	Strongly agree	Agree	Strongly agree	Strongly agree	Strongly agree	Agree	Strongly agree	Strongly agree	Strongly agree	Strongly agree	Agree	Agree	Agree	Agree	Agree	Agree	Agree
2021-03-11 12:08:44	Agree	Third year	Strongly agree	Agree	Strongly agree	Strongly agree	Agree	Agree	Agree	Agree	Agree	Agree	Agree	Agree	Agree	Agree	Agree	Disagree	Agree	Agree	Agree	Agree	Agree	Agree	Agree	Agree	Agree	Agree	Agree	Agree	Agree	Agree	Agree	Agree	Agree	Agree	Agree	Agree	Agree	Agree	Agree	Agree	Agree	Agree	Agree	Agree	Agree	Agree	Agree
2021-03-11 12:33:46	Agree	Fourth year	Strongly agree	Strongly Agree	Strongly agree	Strongly agree	Strongly agree	Agree	Agree	Agree	Agree	Disagree	Agree	Agree	Agree	Agree	Agree	Agree	Agree	Agree	Agree	Agree	Agree	Agree	Agree	Agree	Agree	Agree	Agree	Agree	Agree	Agree	Strongly disagree	Strongly disagree	Agree	Disagree	Disagree	Agree	Agree	Agree	Agree	Agree	Agree	Agree	Agree	Strongly Agree	Strongly Agree	Strongly Agree	Agree
2021-03-11 13:28:55	Agree	Fourth year	neither	Agree	Agree	Agree	Agree	Agree	Agree	Agree	Agree	Agree	Neither	Agree	Disagree	Agree	Agree	Agree	Agree	Agree	Agree	Agree	Agree	Agree	Agree	Agree	Agree	Agree	Agree	Agree	Agree	Agree	Agree	Agree	Agree	Agree	Neither	Neither	Agree	Disagree	Disagree	Neither	Agree	Agree	Agree	Strongly Agree	Strongly Agree	Strongly Agree	Strongly Agree
2021-03-11 13:41:00	Agree	Third year	Agree	Strongly Agree	Strongly agree	Agree	Agree	Strongly agree	Agree	Strongly Agree	Strongly agree	Agree	Strongly agree	Agree	Agree	Agree	Agree	Agree	Agree	Strongly agree	Agree	Strongly agree	Strongly agree	Strongly agree	Strongly agree	Agree	Agree	Strongly agree	Agree	Strongly agree	Strongly agree	Strongly agree	Agree	Strongly agree	Strongly agree	Agree	Strongly agree	Agree	Agree	Agree	Strongly agree	Strongly agree	Agree	Strongly Agree	Strongly Agree	Agree	Strongly Agree	Strongly Agree	Strongly Agree
2021-03-11 15:50:43	Agree	Fourth year	neither	Neither	Neither	Neither	Neither	Neither	Neither	Neither	Neithere	Neither	Neither	Neither	Neither	Neither	Neither	Neither	Neither	Neither	Neither	Neither	Neither	Neither	Neither	Neither	Neither	Neither	Neither	Neither	Neither	Neither	Neither	Neither	Neither	Neither	Neither	Neither	Neither	Neither	Neither	Neither	Neither	Neither	Neither	Neither	Neither	Neither	Neither
2021-03-11 16:37:04	Agree	Fourth year	Strongly agree	Strongly Agree	Agree	Strongly agree	Agree	Strongly agree	Agree	Strongly Agree	Strongly agree	Strongly agree	Strongly agree	Agree	Agree	Agree	Disagree	Neither	Disagree	Neither	Agree	Agree	Agree	Agree	Agree	Disagree	Disagree	Agree	Agree	Agree	Strongly agree	Strongly agree	Strongly agree	Strongly agree	Strongly agree	Strongly agree	Strongly agree	Strongly agree	Strongly agree	Agree	Agree	Strongly agree	Strongly Agree	Strongly Agree	Strongly Agree	Agree	Agree	Agree	Agree
2021-03-12 02:10:59	Agree	Fourth year	Disagree	Strongly Agree	Agree	Agree	Disagree	Disagree	Disagree	Disagree	Disagree	Disagree	Agree	Agree	Agree	Disagree	Disagree	Agree	Disagree	Agree	Disagree	Agree	Agree	Agree	Agree	Agree	Agree	Agree	Agree	Disagree	Agree	Disagree	Agree	Agree	Disagree	Agree	Agree	Agree	Agree	Agree	Agree	Agree	Agree	Agree	Agree	Agree	Agree	Disagree	Disagree
2021-03-12 22:43:23	Agree	Fourth year	Agree	Agree	Agree	Strongly agree	Strongly agree	Strongly agree	Strongly agree	Strongly Agree	Strongly agree	Strongly agree	Strongly agree	Strongly agree	Strongly agree	Agree	Agree	Agree	Agree	Agree	Agree	Agree	Agree	Agree	Agree	Agree	Agree	Agree	Agree	Agree	Agree	Agree	Agree	Agree	Agree	Agree	Agree	Agree	Agree	Agree	Agree	Agree	Agree	Agree	Agree	Agree	Agree	Agree	Agree
2021-03-12 22:56:37	Agree	Fourth year	Disagree	Strongly Agree	Strongly agree	Strongly agree	Agree	Strongly agree	Agree	Disagree	Agree	Disagree	Disagree	Agree	Agree	Agree	Agree	Agree	Agree	Agree	Neither	Strongly disagree	Agree	Strongly agree	Strongly agree	Strongly agree	Strongly agree	Agree	Agree	Agree	Agree	Agree	Agree	Agree	Agree	Agree	Agree	Agree	Agree	Agree	Agree	Agree	Agree	Agree	Agree	Agree	Agree	Agree	Agree
2021-03-12 22:58:12	Agree	Third year	Strongly disagree	Strongly Agree	Strongly agree	Strongly agree	Strongly agree	Strongly agree	Strongly agree	Strongly Agree	Strongly agree	Strongly agree	Strongly agree	Strongly agree	Strongly agree	Strongly disagree	Strongly disagree	Strongly agree	Strongly disagree	Strongly disagree	Strongly disagree	Strongly disagree	Strongly disagree	Strongly disagree	Strongly agree	Strongly agree	Strongly agree	Strongly agree	Strongly agree	Strongly agree	Strongly agree	Strongly agree	Strongly agree	Strongly agree	Strongly disagree	Strongly disagree	Strongly disagree	Strongly agree	Strongly agree	Strongly agree	Strongly agree	Strongly agree	Strongly Agree	Strongly Agree	Strongly Agree	Strongly Agree	Strongly Agree	Strongly Agree	Strongly Agree
2021-03-12 23:06:22	Agree	Third year	Strongly agree	Neither	Strongly agree	Strongly agree	Agree	Agree	Agree	Agree	Agree	Agree	Agree	Agree	Agree	Agree	Agree	Agree	Agree	Agree	Agree	Agree	Agree	Agree	Agree	Agree	Strongly agree	Strongly agree	Strongly agree	Strongly agree	Agree	Disagree	Agree	Agree	Strongly agree	Strongly agree	Strongly agree	Strongly agree	Strongly agree	Agree	Agree	Strongly agree	Agree	Agree	Agree	Agree	Agree	Agree	Agree
2021-03-12 23:12:42	Agree	Third year	Agree	Agree	Strongly agree	Strongly agree	Strongly agree	Agree	Agree	Neither	Agree	Agree	Strongly agree	Strongly agree	Strongly agree	Agree	Neither	Strongly agree	Strongly agree	Strongly agree	Agree	Strongly agree	Agree	Agree	Agree	Agree	Agree	Agree	Agree	Agree	Strongly agree	Agree	Disagree	Neither	Disagree	Neither	Neither	Agree	Neither	Neither	Agree	Agree	Strongly Agree	Strongly Agree	Agree	Agree	Agree	Strongly Agree	Strongly Agree
2021-03-12 23:14:01	Agree	Third year	Agree	Agree	Agree	Agree	Agree	Agree	Agree	Agree	Neithere	Neither	Neither	Neither	Neither	Neither	Neither	Neither	Neither	Neither	Neither	Neither	Neither	Neither	Neither	Neither	Neither	Neither	Neither	Neither	Neither	Neither	Neither	Neither	Neither	Neither	Neither	Neither	Neither	Neither	Neither	Neither	Neither	Neither	Neither	Neither	Neither	Neither	Neither
2021-03-12 23:15:17	Agree	Fourth year	Strongly disagree	Agree	Agree	Strongly disagree	Strongly disagree	Strongly disagree	Agree	Strongly disagree	Agree	Agree	Neither	Neither	Neither	Neither	Neither	Neither	Neither	Neither	Neither	Neither	Neither	Neither	Neither	Neither	Neither	Neither	Neither	Agree	Neither	Agree	Neither	Agree	Neither	Agree	Agree	Neither	Neither	Agree	Agree	Agree	Agree	Agree	Agree	Agree	Agree	Agree	Agree
2021-03-12 23:18:19	Agree	Fourth year	Strongly agree	Strongly Agree	Strongly agree	Strongly agree	Neither	Agree	Agree	Strongly Agree	Strongly agree	Agree	Strongly agree	Strongly agree	Strongly agree	Neither	Agree	Neither	Neither	Agree	Agree	Agree	Strongly agree	Agree	Strongly agree	Agree	Neither	Neither	Agree	Agree	Neither	Agree	Neither	Neither	Neither	Neither	Neither	Agree	Agree	Agree	Agree	Agree	Agree	Agree	Agree	Neither	Agree	Agree	Agree
2021-03-12 23:18:30	Agree	Fourth year	neither	Neither	Disagree	Strongly disagree	Agree	Agree	Neither	Agree	Agree	Neither	Agree	Agree	Agree	Neither	Agree	Agree	Agree	Agree	Agree	Agree	Agree	Agree	Agree	Agree	Agree	Agree	Agree	Agree	Agree	Agree	Agree	Agree	Agree	Agree	Agree	Agree	Agree	Agree	Agree	Agree	Agree	Disagree	Disagree	Neither	Agree	Strongly Disagree	Neither
2021-03-12 23:21:38	Agree	Fourth year	Agree	Agree	Agree	Agree	Agree	Agree	Agree	Agree	Agree	Agree	Agree	Agree	Agree	Agree	Agree	Agree	Agree	Agree	Agree	Agree	Agree	Agree	Agree	Agree	Agree	Agree	Agree	Agree	Agree	Agree	Agree	Agree	Agree	Agree	Agree	Agree	Agree	Agree	Agree	Agree	Agree	Agree	Agree	Agree	Agree	Agree	Agree
2021-03-12 23:28:55	Agree	Fourth year	Strongly agree	Strongly Agree	Strongly agree	Strongly agree	Strongly agree	Strongly agree	Strongly agree	Strongly Agree	Strongly agree	Strongly agree	Strongly agree	Strongly agree	Strongly agree	Agree	Agree	Disagree	Agree	Agree	Agree	Agree	Agree	Agree	Neither	Agree	Agree	Agree	Agree	Agree	Agree	Agree	Agree	Agree	Agree	Agree	Agree	Agree	Agree	Agree	Agree	Agree	Agree	Agree	Agree	Agree	Agree	Agree	Agree
2021-03-12 23:29:05	Agree	Fourth year	neither	Agree	Agree	Strongly agree	Strongly agree	Strongly agree	Neither	Strongly Agree	Strongly agree	Strongly agree	Strongly agree	Strongly agree	Agree	Agree	Strongly agree	Agree	Agree	Agree	Disagree	Strongly agree	Strongly agree	Strongly agree	Strongly agree	Agree	Strongly disagree	Agree	Strongly agree	Strongly agree	Agree	Agree	Strongly agree	Agree	Strongly agree	Strongly agree	Strongly agree	Strongly agree	Strongly agree	Strongly agree	Agree	Neither	Neither	Agree	Strongly Agree	Strongly Disagree	Strongly Agree	Strongly Agree	Strongly Agree
2021-03-12 23:35:10	Agree	Fourth year	Agree	Neither	Agree	Neither	Agree	Agree	Agree	Agree	Agree	Agree	Agree	Agree	Agree	Neither	Neither	Agree	Agree	Agree	Agree	Agree	Agree	Agree	Agree	Agree	Agree	Agree	Agree	Agree	Agree	Agree	Disagree	Disagree	Agree	Agree	Agree	Agree	Agree	Agree	Agree	Agree	Agree	Agree	Strongly Agree	Agree	Agree	Agree	Agree
2021-03-12 23:54:43	Agree	Third year	Agree	Agree	Strongly agree	Agree	Agree	Agree	Strongly agree	Agree	Agree	Agree	Agree	Agree	Agree	Agree	Agree	Agree	Agree	Agree	Agree	Agree	Agree	Agree	Agree	Agree	Agree	Agree	Agree	Agree	Agree	Agree	Agree	Strongly agree	Agree	Agree	Agree	Agree	Agree	Agree	Agree	Agree	Agree	Agree	Agree	Agree	Agree	Agree	Agree
2021-03-13 00:05:32	Agree	Third year	Agree	Neither	Strongly agree	Strongly agree	Agree	Agree	Strongly agree	Neither	Neithere	Agree	Agree	Strongly agree	Disagree	Neither	Agree	Agree	Neither	Neither	Agree	Agree	Neither	Strongly agree	Agree	Agree	Agree	Agree	Agree	Agree	Agree	Agree	Disagree	Neither	Neither	Agree	Agree	Agree	Agree	Neither	Agree	Agree	Agree	Agree	Neither	Strongly Agree	Agree	Agree	Agree
2021-03-13 00:10:43	Agree	Third year	Strongly agree	Neither	Strongly agree	Strongly agree	Agree	Agree	Agree	Agree	Agree	Agree	Agree	Agree	Agree	Agree	Agree	Agree	Agree	Agree	Agree	Agree	Agree	Agree	Agree	Agree	Strongly agree	Strongly agree	Strongly agree	Strongly agree	Agree	Disagree	Agree	Agree	Strongly agree	Strongly agree	Strongly agree	Strongly agree	Strongly agree	Agree	Agree	Strongly agree	Agree	Agree	Agree	Agree	Agree	Agree	Agree
2021-03-13 00:12:14	Agree	Fourth year	Strongly agree	Agree	Agree	Agree	Agree	Agree	Agree	Neither	Neithere	Agree	Agree	Agree	Agree	Agree	Agree	Neither	Neither	Agree	Neither	Agree	Strongly agree	Agree	Neither	Agree	Neither	Agree	Neither	Neither	Agree	Agree	Neither	Neither	Neither	Agree	Agree	Strongly agree	Agree	Agree	Neither	Agree	Strongly Agree	Strongly Agree	Strongly Agree	Agree	Strongly Agree	Neither	Neither
2021-03-13 00:15:57	Agree	Third year	Strongly agree	Strongly Agree	Strongly agree	Strongly agree	Strongly agree	Strongly agree	Strongly agree	Strongly Agree	Strongly agree	Strongly agree	Strongly agree	Strongly agree	Strongly agree	Strongly agree	Strongly agree	Strongly agree	Strongly agree	Strongly agree	Strongly agree	Strongly agree	Strongly agree	Strongly agree	Strongly agree	Strongly agree	Strongly agree	Strongly agree	Strongly agree	Strongly agree	Strongly agree	Strongly agree	Strongly agree	Strongly agree	Strongly agree	Strongly agree	Strongly agree	Strongly agree	Strongly agree	Strongly agree	Strongly agree	Strongly agree	Strongly Agree	Strongly Agree	Strongly Agree	Strongly Agree	Strongly Agree	Strongly Agree	Strongly Agree
2021-03-13 00:17:17	Agree	Third year	Agree	Agree	Agree	Strongly agree	Agree	Agree	Strongly agree	Disagree	Neithere	Agree	Agree	Agree	Agree	Neither	Neither	Neither	Agree	Neither	Agree	Agree	Neither	Neither	Neither	Agree	Neither	Agree	Agree	Neither	Neither	Agree	Neither	Agree	Neither	Neither	Neither	Agree	Agree	Agree	Neither	Agree	Strongly Agree	Agree	Strongly Agree	Agree	Agree	Agree	Agree
2021-03-13 00:19:32	Agree	Third year	Agree	Agree	Agree	Agree	Strongly agree	Strongly agree	Strongly agree	Neither	Strongly agree	Neither	Strongly agree	Agree	Agree	Agree	Agree	Agree	Agree	Strongly agree	Strongly agree	Agree	Strongly agree	Strongly agree	Strongly agree	Strongly agree	Strongly agree	Agree	Agree	Agree	Strongly agree	Agree	Agree	Agree	Agree	Agree	Agree	Strongly agree	Strongly agree	Strongly agree	Strongly agree	Agree	Agree	Agree	Strongly Agree	Agree	Agree	Agree	Agree
2021-03-13 00:26:09	Agree	Third year	Agree	Agree	Agree	Agree	Agree	Agree	Agree	Agree	Agree	Agree	Agree	Agree	Agree	Agree	Agree	Agree	Agree	Agree	Agree	Agree	Agree	Agree	Agree	Agree	Agree	Agree	Agree	Agree	Agree	Agree	Agree	Agree	Agree	Agree	Agree	Agree	Agree	Agree	Agree	Agree	Agree	Agree	Agree	Agree	Agree	Agree	Agree
2021-03-13 00:42:32	Agree	Third year	Strongly disagree	Strongly Agree	Strongly agree	Strongly agree	Strongly agree	Strongly agree	Strongly agree	Strongly Agree	Strongly agree	Strongly agree	Strongly agree	Strongly agree	Strongly agree	Strongly disagree	Strongly disagree	Strongly agree	Strongly disagree	Strongly disagree	Strongly disagree	Strongly disagree	Strongly disagree	Strongly disagree	Strongly agree	Strongly agree	Strongly agree	Strongly agree	Strongly agree	Strongly agree	Strongly agree	Strongly agree	Strongly agree	Strongly agree	Strongly disagree	Strongly disagree	Strongly disagree	Strongly agree	Strongly agree	Strongly agree	Strongly agree	Strongly agree	Strongly Agree	Strongly Agree	Strongly Agree	Strongly Agree	Strongly Agree	Strongly Agree	Strongly Agree
2021-03-13 05:35:31	Agree	Fourth year	Agree	Agree	Agree	Agree	Agree	Agree	Agree	Agree	Agree	Agree	Neither	Neither	Agree	Agree	Agree	Strongly agree	Strongly agree	Agree	Agree	Agree	Agree	Agree	Agree	Agree	Disagree	Agree	Neither	Agree	Strongly agree	Agree	Agree	Agree	Agree	Agree	Disagree	Agree	Strongly agree	Strongly agree	Agree	Agree	Agree	Agree	Strongly Disagree	Strongly Agree	Agree	Agree	Strongly Agree
2021-03-13 13:24:36	Agree	Third year	Strongly agree	Strongly Agree	Strongly agree	Strongly agree	Strongly agree	Strongly agree	Strongly agree	Strongly Agree	Strongly agree	Strongly agree	Strongly agree	Strongly agree	Strongly agree	Disagree	Disagree	Agree	Agree	Agree	Agree	Agree	Agree	Agree	Agree	Agree	Neither	Agree	Agree	Agree	Agree	Agree	Agree	Agree	Agree	Strongly agree	Agree	Agree	Agree	Agree	Agree	Strongly agree	Strongly Agree	Strongly Agree	Strongly Agree	Strongly Agree	Strongly Agree	Strongly Agree	Strongly Agree
2021-03-13 13:34:03	Agree	Third year	Strongly agree	Strongly Agree	Strongly agree	Strongly agree	Strongly agree	Neither	Strongly agree	Strongly Agree	Agree	Neither	Neither	Agree	Strongly agree	Strongly agree	Agree	Neither	Disagree	Neither	Disagree	Disagree	Disagree	Strongly agree	Strongly agree	Strongly agree	Strongly agree	Strongly agree	Disagree	Neither	Agree	Neither	Disagree	Agree	Agree	Disagree	Agree	Neither	Neither	Neither	Agree	Disagree	Strongly Agree	Agree	Agree	Strongly Agree	Agree	Strongly Agree	Neither
2021-03-13 15:10:38	Agree	Third year	Agree	Agree	Agree	Agree	Strongly agree	Strongly agree	Strongly agree	Strongly Agree	Strongly agree	Strongly agree	Strongly agree	Strongly agree	Strongly agree	Neither	Neither	Agree	Strongly agree	Agree	Agree	Agree	Agree	Strongly agree	Neither	Neither	Neither	Neither	Neither	Neither	Neither	Agree	Agree	Agree	Agree	Agree	Strongly agree	Strongly agree	Neither	Agree	Neither	Neither	Strongly Agree	Strongly Agree	Strongly Agree	Strongly Agree	Neither	Agree	Strongly Agree
2021-03-13 17:01:05	Agree	Third year	Strongly agree	Strongly Agree	Agree	Agree	Agree	Agree	Agree	Agree	Agree	Agree	Agree	Agree	Agree	Agree	Agree	Agree	Agree	Agree	Agree	Agree	Agree	Agree	Agree	Agree	Agree	Agree	Agree	Agree	Agree	Agree	Agree	Agree	Agree	Agree	Agree	Agree	Agree	Agree	Agree	Agree	Agree	Strongly Agree	Strongly Agree	Strongly Agree	Agree	Agree	Agree
2021-03-13 17:18:46	Agree	Fourth year	Disagree	Strongly Agree	Agree	Agree	Disagree	Disagree	Disagree	Disagree	Disagree	Disagree	Agree	Agree	Agree	Disagree	Disagree	Agree	Disagree	Agree	Disagree	Agree	Agree	Agree	Agree	Agree	Agree	Agree	Agree	Disagree	Agree	Disagree	Agree	Agree	Disagree	Agree	Agree	Agree	Agree	Agree	Agree	Agree	Agree	Agree	Agree	Agree	Agree	Disagree	Disagree
2021-03-13 17:50:14	Agree	Third year	Strongly agree	Strongly Agree	Agree	Agree	Agree	Agree	Agree	Agree	Agree	Agree	Agree	Agree	Agree	Agree	Agree	Agree	Agree	Agree	Agree	Agree	Agree	Agree	Agree	Agree	Agree	Agree	Agree	Agree	Agree	Agree	Agree	Agree	Agree	Agree	Agree	Agree	Agree	Agree	Agree	Agree	Agree	Strongly Agree	Strongly Agree	Strongly Agree	Agree	Agree	Agree
2021-03-13 18:22:12	Agree	Third year	Agree	Agree	Agree	Neither	Neither	Agree	Agree	Neither	Neithere	Agree	Agree	Agree	Agree	Agree	Agree	Neither	Agree	Agree	Agree	Agree	Agree	Agree	Agree	Agree	Agree	Agree	Agree	Agree	Agree	Agree	Disagree	Disagree	Agree	Agree	Neither	Agree	Agree	Agree	Agree	Agree	Agree	Agree	Agree	Agree	Agree	Strongly Agree	Strongly Agree
2021-03-13 19:10:57	Agree	Third year	Agree	Agree	Agree	Agree	Strongly agree	Strongly agree	Strongly agree	Neither	Strongly agree	Neither	Strongly agree	Agree	Agree	Agree	Agree	Agree	Agree	Strongly agree	Strongly agree	Agree	Strongly agree	Strongly agree	Strongly agree	Strongly agree	Strongly agree	Agree	Agree	Agree	Strongly agree	Agree	Agree	Agree	Agree	Agree	Agree	Strongly agree	Strongly agree	Strongly agree	Strongly agree	Agree	Agree	Agree	Strongly Agree	Agree	Agree	Agree	Agree
2021-03-13 21:54:10	Agree	Fourth year	Agree	Agree	Agree	Agree	Agree	Agree	Agree	Agree	Agree	Agree	Agree	Agree	Agree	Agree	Agree	Agree	Agree	Agree	Agree	Agree	Agree	Agree	Agree	Agree	Agree	Agree	Agree	Agree	Agree	Agree	Agree	Agree	Agree	Agree	Agree	Agree	Agree	Agree	Agree	Agree	Agree	Agree	Agree	Agree	Agree	Agree	Agree
2021-03-13 22:57:48	Agree	Third year	Agree	Agree	Agree	Agree	Agree	Agree	Strongly agree	Neither	Agree	Agree	Strongly agree	Agree	Agree	Disagree	Agree	Neither	Agree	Agree	Neither	Strongly agree	Agree	Agree	Strongly agree	Neither	Agree	Agree	Agree	Strongly agree	Agree	Strongly agree	Agree	Agree	Neither	Strongly agree	Agree	Disagree	Strongly agree	Strongly agree	Agree	Agree	Neither	Agree	Agree	Agree	Neither	Neither	Neither
2021-03-14 05:10:29	Agree	Third year	Agree	Agree	Agree	Agree	Agree	Agree	Agree	Agree	Neithere	Neither	Neither	Neither	Neither	Neither	Neither	Neither	Neither	Neither	Neither	Neither	Neither	Neither	Neither	Neither	Neither	Neither	Neither	Neither	Neither	Neither	Neither	Neither	Neither	Neither	Neither	Neither	Neither	Neither	Neither	Neither	Neither	Neither	Neither	Neither	Neither	Neither	Neither
2021-03-14 08:22:30	Agree	Third year	Agree	Agree	Agree	Agree	Agree	Agree	Strongly agree	Neither	Agree	Agree	Strongly agree	Agree	Agree	Disagree	Agree	Neither	Agree	Agree	Neither	Strongly agree	Agree	Agree	Strongly agree	Neither	Agree	Agree	Agree	Strongly agree	Agree	Strongly agree	Agree	Agree	Neither	Strongly agree	Agree	Disagree	Strongly agree	Strongly agree	Agree	Agree	Neither	Agree	Agree	Agree	Neither	Neither	Neither
2021-03-14 08:30:46	Agree	Fourth year	Strongly agree	Strongly Agree	Strongly agree	Strongly agree	Strongly agree	Strongly agree	Strongly agree	Strongly Agree	Strongly agree	Strongly agree	Strongly agree	Strongly agree	Strongly agree	Strongly agree	Strongly agree	Strongly agree	Strongly agree	Strongly agree	Strongly agree	Strongly agree	Strongly agree	Strongly agree	Strongly agree	Strongly agree	Strongly agree	Strongly agree	Strongly agree	Strongly agree	Strongly agree	Strongly agree	Strongly agree	Strongly agree	Strongly agree	Strongly agree	Strongly agree	Strongly agree	Strongly agree	Strongly agree	Strongly agree	Strongly agree	Agree	Agree	Agree	Agree	Agree	Agree	Agree
2021-03-14 09:10:13	Agree	Third year	Agree	Agree	Agree	Agree	Agree	Agree	Strongly agree	Neither	Agree	Agree	Strongly agree	Agree	Agree	Disagree	Agree	Neither	Agree	Agree	Neither	Strongly agree	Agree	Agree	Strongly agree	Neither	Agree	Agree	Agree	Strongly agree	Agree	Strongly agree	Agree	Agree	Neither	Strongly agree	Agree	Disagree	Strongly agree	Strongly agree	Agree	Agree	Neither	Agree	Agree	Agree	Neither	Neither	Neither
2021-03-14 09:21:04	Agree	Third year	Agree	Agree	Agree	Agree	Agree	Agree	Strongly agree	Neither	Agree	Agree	Strongly agree	Agree	Agree	Disagree	Agree	Neither	Agree	Agree	Neither	Strongly agree	Agree	Agree	Strongly agree	Neither	Agree	Agree	Agree	Strongly agree	Agree	Strongly agree	Agree	Agree	Neither	Strongly agree	Agree	Disagree	Strongly agree	Strongly agree	Agree	Agree	Neither	Agree	Agree	Agree	Neither	Neither	Neither
2021-03-14 12:25:43	Agree	Fourth year	Strongly agree	Strongly Agree	Strongly agree	Strongly agree	Strongly agree	Strongly agree	Strongly agree	Strongly Agree	Strongly agree	Strongly agree	Strongly agree	Strongly agree	Strongly agree	Strongly agree	Strongly agree	Strongly agree	Strongly agree	Strongly agree	Strongly agree	Strongly agree	Strongly agree	Strongly agree	Strongly agree	Strongly agree	Strongly agree	Strongly agree	Strongly agree	Strongly agree	Strongly agree	Strongly agree	Strongly agree	Strongly agree	Strongly agree	Strongly agree	Strongly agree	Strongly agree	Strongly agree	Strongly agree	Strongly agree	Strongly agree	Agree	Agree	Agree	Agree	Agree	Agree	Agree
2021-03-14 13:43:35	Agree	Third year	Agree	Agree	Agree	Agree	Agree	Agree	Agree	Agree	Agree	Agree	Agree	Agree	Agree	Agree	Agree	Agree	Agree	Agree	Agree	Agree	Agree	Agree	Agree	Agree	Agree	Agree	Agree	Agree	Agree	Agree	Agree	Agree	Agree	Agree	Agree	Agree	Agree	Agree	Agree	Agree	Agree	Agree	Agree	Agree	Agree	Agree	Agree
2021-03-14 13:44:10	Agree	Third year	Agree	Agree	Agree	Agree	Agree	Agree	Agree	Agree	Agree	Agree	Agree	Agree	Agree	Agree	Agree	Agree	Agree	Agree	Agree	Agree	Agree	Agree	Agree	Agree	Agree	Agree	Agree	Agree	Agree	Agree	Agree	Agree	Agree	Agree	Agree	Agree	Agree	Agree	Agree	Agree	Agree	Agree	Agree	Agree	Agree	Agree	Agree
2021-03-14 14:33:40	Agree	Third year	neither	Agree	Agree	Neither	Agree	Agree	Agree	Neither	Agree	Neither	Agree	Agree	Agree	Neither	Agree	Agree	Neither	Agree	Agree	Neither	Agree	Agree	Strongly agree	Agree	Neither	Agree	Agree	Neither	Agree	Agree	Agree	Neither	Neither	Neither	Agree	Neither	Agree	Agree	Neither	Agree	Neither	Neither	Neither	Strongly Agree	Agree	Neither	Neither
2021-03-14 14:40:05	Agree	Third year	Strongly agree	Agree	Strongly agree	Strongly agree	Strongly agree	Strongly agree	Strongly agree	Strongly Agree	Strongly agree	Disagree	Strongly agree	Disagree	Strongly agree	Agree	Agree	Agree	Agree	Agree	Agree	Agree	Agree	Agree	Agree	Agree	Agree	Agree	Agree	Agree	Agree	Agree	Agree	Agree	Agree	Agree	Agree	Agree	Agree	Agree	Agree	Agree	Agree	Agree	Agree	Agree	Agree	Agree	Agree
2021-03-14 14:51:23	Agree	Fourth year	Agree	Agree	Agree	Agree	Agree	Neither	Agree	Agree	Agree	Agree	Agree	Agree	Neither	Neither	Agree	Agree	Agree	Agree	Agree	Strongly agree	Agree	Agree	Agree	Agree	Agree	Agree	Agree	Agree	Agree	Agree	Agree	Disagree	Agree	Agree	Neither	Disagree	Disagree	Neither	Neither	Neither	Agree	Agree	Agree	Strongly Agree	Agree	Neither	Neither
2021-03-14 15:04:23	Agree	Third year	Strongly agree	Strongly Agree	Agree	Agree	Strongly agree	Agree	Strongly agree	Disagree	Neithere	Disagree	Agree	Strongly agree	Strongly disagree	Strongly disagree	Strongly disagree	Neither	Disagree	Strongly agree	Agree	Strongly agree	Neither	Strongly agree	Agree	Agree	Agree	Agree	Strongly agree	Strongly agree	Strongly agree	Disagree	Strongly disagree	Disagree	Agree	Disagree	Strongly disagree	Agree	Strongly agree	Agree	Agree	Agree	Strongly Agree	Strongly Agree	Strongly Agree	Strongly Agree	Strongly Agree	Strongly Agree	Strongly Agree
2021-03-14 15:06:37	Agree	Third year	Strongly disagree	Strongly disagree	Strongly disagree	Strongly disagree	Strongly disagree	Strongly disagree	Strongly disagree	Strongly disagree	Strongly disagree	Strongly disagree	Strongly disagree	Strongly disagree	Strongly disagree	Strongly agree	Strongly agree	Strongly agree	Neither	Strongly agree	Strongly agree	Strongly agree	Agree	Strongly agree	Strongly agree	Agree	Agree	Agree	Strongly agree	Strongly agree	Strongly agree	Neither	Strongly agree	Strongly agree	Strongly disagree	Strongly disagree	Disagree	Disagree	Disagree	Neither	Strongly disagree	Strongly disagree	Strongly Agree	Strongly Agree	Strongly Agree	Strongly Agree	Strongly Disagree	Strongly Agree	Strongly Agree
2021-03-14 15:54:30	Agree	Fourth year	Strongly disagree	Strongly disagree	Neither	Agree	Strongly agree	Strongly agree	Agree	Neither	Agree	Strongly disagree	Neither	Agree	Strongly disagree	Strongly disagree	Agree	Strongly agree	Strongly agree	Strongly agree	Strongly agree	Agree	Strongly disagree	Strongly agree	Strongly agree	Disagree	Strongly agree	Strongly agree	Disagree	Strongly agree	Strongly agree	Disagree	Strongly agree	Neither	Strongly agree	Disagree	Strongly agree	Strongly agree	Strongly agree	Strongly agree	Strongly agree	Agree	Neither	Neither	Strongly Disagree	Strongly Agree	Agree	Strongly Agree	Strongly Disagree
2021-03-14 16:09:11	Agree	Fourth year	Agree	Strongly Agree	Agree	Agree	Agree	Strongly agree	Strongly agree	Strongly Agree	Strongly agree	Neither	Strongly agree	Strongly agree	Strongly agree	Strongly agree	Agree	Agree	Strongly agree	Strongly agree	Agree	Strongly agree	Strongly agree	Strongly agree	Strongly agree	Strongly agree	Strongly agree	Strongly agree	Strongly agree	Strongly agree	Strongly agree	Strongly agree	Agree	Neither	Neither	Agree	Neither	Neither	Neither	Agree	Agree	Strongly agree	Strongly Agree	Strongly Agree	Agree	Agree	Neither	Strongly Agree	Agree
2021-03-14 16:10:18	Agree	Third year	neither	Agree	Agree	Neither	Agree	Agree	Agree	Neither	Agree	Neither	Agree	Agree	Agree	Neither	Agree	Agree	Neither	Agree	Agree	Neither	Agree	Agree	Strongly agree	Agree	Neither	Agree	Agree	Neither	Agree	Agree	Agree	Neither	Neither	Neither	Agree	Neither	Agree	Agree	Neither	Agree	Neither	Neither	Neither	Strongly Agree	Agree	Neither	Neither
2021-03-14 16:11:56	Agree	Third year	neither	Agree	Agree	Neither	Agree	Agree	Agree	Neither	Agree	Neither	Agree	Agree	Agree	Neither	Agree	Agree	Neither	Agree	Agree	Neither	Agree	Agree	Strongly agree	Agree	Neither	Agree	Agree	Neither	Agree	Agree	Agree	Neither	Neither	Neither	Agree	Neither	Agree	Agree	Neither	Agree	Neither	Neither	Neither	Strongly Agree	Agree	Neither	Neither
2021-03-14 16:30:12	Agree	Fourth year	Strongly agree	Strongly Agree	Strongly agree	Agree	Strongly agree	Strongly agree	Strongly agree	Strongly Agree	Strongly agree	Strongly agree	Strongly agree	Strongly agree	Strongly agree	Agree	Agree	Strongly agree	Agree	Agree	Agree	Agree	Agree	Strongly agree	Agree	Agree	Agree	Strongly agree	Agree	Strongly agree	Agree	Neither	Strongly disagree	Strongly disagree	Strongly disagree	Neither	Agree	Agree	Agree	Agree	Neither	Neither	Strongly Agree	Strongly Agree	Strongly Agree	Strongly Agree	Strongly Agree	Strongly Agree	Strongly Agree
2021-03-14 17:22:53	Agree	Fourth year	Agree	Agree	Agree	Agree	Agree	Neither	Agree	Agree	Agree	Neither	Agree	Agree	Agree	Agree	Agree	Agree	Disagree	Neither	Disagree	Disagree	Disagree	Neither	Disagree	Neither	Neither	Neither	Agree	Agree	Neither	Disagree	Neither	Agree	Agree	Neither	Agree	Agree	Agree	Agree	Agree	Neither	Agree	Agree	Agree	Agree	Neither	Agree	Agree
2021-03-14 17:38:29	Agree	Fourth year	Strongly disagree	Strongly disagree	Neither	Agree	Strongly agree	Strongly agree	Agree	Neither	Agree	Strongly disagree	Neither	Agree	Strongly disagree	Strongly disagree	Agree	Strongly agree	Strongly agree	Strongly agree	Strongly agree	Agree	Strongly disagree	Strongly agree	Strongly agree	Disagree	Strongly agree	Strongly agree	Disagree	Strongly agree	Strongly agree	Disagree	Strongly agree	Neither	Strongly agree	Disagree	Strongly agree	Strongly agree	Strongly agree	Strongly agree	Strongly agree	Agree	Neither	Neither	Strongly Disagree	Strongly Agree	Agree	Strongly Agree	Strongly Disagree
2021-03-14 18:38:34	Agree	Fourth year	Strongly agree	Strongly Agree	Strongly agree	Agree	Agree	Disagree	Agree	Agree	Agree	Agree	Agree	Agree	Neither	Agree	Agree	Neither	Agree	Agree	Agree	Agree	Strongly agree	Agree	Strongly agree	Agree	Neither	Agree	Agree	Agree	Agree	Agree	Disagree	Disagree	Agree	Agree	Neither	Agree	Strongly agree	Neither	Agree	Strongly agree	Agree	Agree	Agree	Agree	Agree	Agree	Agree
2021-03-14 19:12:22	Agree	Third year	Strongly disagree	Strongly disagree	Strongly disagree	Disagree	Disagree	Strongly disagree	Strongly disagree	Strongly disagree	Strongly disagree	Strongly disagree	Strongly disagree	Disagree	Strongly disagree	Strongly disagree	Strongly disagree	Strongly disagree	Strongly disagree	Strongly disagree	Strongly disagree	Strongly disagree	Strongly disagree	Strongly disagree	Agree	Agree	Agree	Agree	Agree	Agree	Agree	Agree	Strongly disagree	Agree	Agree	Agree	Agree	Agree	Agree	Agree	Agree	Agree	Agree	Agree	Agree	Agree	Agree	Agree	Agree
2021-03-14 19:18:41	Agree	Third year	Agree	Agree	Agree	Agree	Agree	Agree	Agree	Agree	Agree	Agree	Agree	Agree	Agree	Agree	Agree	Agree	Agree	Agree	Agree	Agree	Agree	Agree	Agree	Agree	Agree	Agree	Agree	Agree	Agree	Agree	Agree	Agree	Agree	Agree	Agree	Agree	Agree	Agree	Agree	Agree	Strongly Agree	Strongly Agree	Strongly Agree	Strongly Agree	Strongly Agree	Strongly Agree	Strongly Agree
2021-03-14 19:27:15	Agree	Third year	Agree	Agree	Agree	Agree	Agree	Neither	Neither	Agree	Neithere	Agree	Agree	Agree	Agree	Neither	Neither	Agree	Neither	Neither	Agree	Agree	Agree	Agree	Agree	Neither	Agree	Neither	Disagree	Agree	Agree	Neither	Neither	Agree	Agree	Agree	Neither	Neither	Agree	Disagree	Agree	Agree	Neither	Disagree	Agree	Neither	Agree	Agree	Agree
2021-03-14 20:23:07	Agree	Fourth year	Strongly agree	Strongly Agree	Strongly agree	Strongly agree	Strongly agree	Agree	Agree	Strongly Agree	Strongly agree	Strongly agree	Agree	Agree	Agree	Agree	Agree	Agree	Strongly agree	Agree	Agree	Agree	Agree	Agree	Agree	Agree	Agree	Agree	Agree	Agree	Agree	Agree	Agree	Agree	Agree	Agree	Agree	Agree	Agree	Agree	Agree	Agree	Agree	Agree	Agree	Agree	Agree	Agree	Agree
2021-03-14 20:26:20	Agree	Fourth year	Agree	Agree	Agree	Agree	Agree	Agree	Agree	Agree	Agree	Agree	Agree	Agree	Agree	Agree	Agree	Agree	Agree	Agree	Agree	Agree	Agree	Agree	Agree	Agree	Agree	Agree	Agree	Agree	Agree	Agree	Agree	Agree	Agree	Agree	Agree	Agree	Agree	Agree	Agree	Agree	Agree	Agree	Agree	Agree	Agree	Agree	Agree
2021-03-14 21:32:59	Agree	Fourth year	Agree	Agree	Agree	Agree	Agree	Neither	Agree	Agree	Agree	Agree	Agree	Agree	Neither	Neither	Agree	Agree	Agree	Agree	Agree	Strongly agree	Agree	Agree	Agree	Agree	Agree	Agree	Agree	Agree	Agree	Agree	Agree	Disagree	Agree	Agree	Neither	Disagree	Disagree	Neither	Neither	Neither	Agree	Agree	Agree	Strongly Agree	Agree	Neither	Neither
2021-03-14 21:56:25	Agree	Fourth year	Strongly agree	Strongly Agree	Strongly agree	Strongly agree	Strongly agree	Strongly agree	Strongly agree	Agree	Neithere	Neither	Strongly agree	Strongly agree	Agree	Disagree	Disagree	Neither	Agree	Disagree	Neither	Disagree	Agree	Disagree	Agree	Strongly agree	Agree	Agree	Agree	Agree	Neither	Agree	Neither	Agree	Agree	Agree	Agree	Agree	Agree	Agree	Neither	Neither	Neither	Agree	Agree	Neither	Strongly Agree	Agree	Strongly Agree
[truncated: 45 more columns]
